1           **Frontoparietal action-oriented codes support novel**

2                           **instruction implementation**

3           Carlos González-García, Silvia Formica, David Wisniewski, and Marcel Brass

4                           Department of Experimental Psychology, Ghent University, Belgium

5

6           **Corresponding author:** Carlos González-García

7           (carlos.gonzalezgarcia@ugent.be)

8

## 9 **Abstract**

10 A key aspect of human cognitive flexibility concerns the ability to convert complex  
11 symbolic instructions into novel behaviors. Previous research proposes that this  
12 transformation is supported by two neurocognitive states: an initial declarative  
13 maintenance of task knowledge, and an implementation state necessary for  
14 optimal task execution. Furthermore, current models predict a crucial role of frontal  
15 and parietal brain regions in this process. However, whether declarative and  
16 procedural signals independently contribute to implementation remains unknown.  
17 We report the results of an fMRI experiment in which participants executed novel  
18 instructed stimulus-response associations. We then used a pattern-tracking  
19 procedure to quantify the contribution of format-unique signals during instruction  
20 implementation. This revealed independent procedural and declarative  
21 representations of novel S-Rs in frontoparietal areas, prior to execution. Critically,  
22 the degree of procedural activation predicted subsequent behavioral performance.  
23 Altogether, our results suggest an important contribution of frontoparietal regions to  
24 the neural architecture that regulates cognitive flexibility.

25 **Keywords:** “Cognitive Control”, “Instructions”, “fMRI”, “multivariate analysis”,  
26 “frontoparietal network”, “retro-cues”

27

## 28 INTRODUCTION

29 Instruction following constitutes a powerful instance of human cognitive flexibility.  
30 The greater specificity and efficiency in the transmission of task procedures  
31 compared to trial-and-error or reinforcement learning make it a distinctive skill that  
32 separates humans from other species (Cole et al., 2013). While recent years have  
33 witnessed substantial progress in our understanding of instruction following, the  
34 precise neural coding schemes that organize brain activity during the rapid  
35 transformation of abstract instructed content into effective behavior are still poorly  
36 understood.

37 Previous behavioral studies have reported an intriguing signature of instruction  
38 processing, namely, a rapid configuration of instructed content predominantly  
39 towards action (González-García et al., 2020; Liefoghe et al., 2012, 2013;  
40 Liefoghe and De Houwer, 2018; Meiran et al., 2012, 2015a). This signature  
41 separates instruction implementation from related work in task switching and  
42 working memory: although preparation for action is not unique to novel  
43 instructions, in other contexts repetitive task execution makes it possible to retrieve  
44 specific long-term memory traces that allows for successful execution (Qiao et al.,  
45 2017; Zhang et al., 2013). In instruction implementation, however, long-term  
46 memory traces are reasonably ruled out (Liefoghe et al., 2012; Meiran et al.,  
47 2015a; Muhle-Karbe et al., 2016), and rather, an efficient proactive configuration  
48 can be achieved without prior practice. This configuration has a profound impact  
49 on brain activity. The intention to execute an instruction induces automatic motor  
50 activation (Everaert et al., 2014; Meiran et al., 2015b) and specific oscillatory

51 features (Formica et al., 2020b), engages different brain regions to coordinate  
52 novel stimuli and responses (Demanet et al., 2016; González-García et al., 2017a;  
53 Hartstra et al., 2011; Palenciano et al., 2019b, 2019a), and alters the neural  
54 representation of instructed content in control brain regions, primarily, the  
55 frontoparietal network (FPN) (Bourguignon et al., 2018; Muhle-Karbe et al., 2017).  
56 These and other findings propose a crucial role of the FPN in the rapid access to  
57 and configuration of an implementation stage, a highly efficient task readiness  
58 state that support successful execution (Bourguignon et al., 2018; González-  
59 García et al., 2017b; Hartstra et al., 2011; Muhle-Karbe et al., 2017; Palenciano et  
60 al., 2019b, 2019a; Woolgar et al., 2015).

61 To account for these findings, prominent theoretical models (Brass et al., 2017) put  
62 forward a *serial-coding hypothesis* of frontoparietal function, a multi-step process in  
63 which the FPN first encodes instructed information into a *declarative* code, that is,  
64 a persistent representation of the memoranda conveyed by the instruction. When  
65 this information becomes behaviorally relevant, FPN declarative representations  
66 are transformed into an implementation state that is optimized for specific task  
67 demands (Brass et al., 2017). Current models propose that such implementation  
68 state consists primarily of *procedural* codes, a proactive binding of relevant  
69 perceptual and motor information into a compound representation that leads to the  
70 boost of relevant action codes related to behavioral routines (Muhle-Karbe et al.,  
71 2017).

72 However, the characterization of neural coding during implementation remains  
73 unclear, primarily due to the fact that previous analytical approaches were unable

74 to track representational formats of specific nature. Previous work thus identified  
75 some properties of the FPN during the implementation of novel instructions, such  
76 as enhanced decoding of stimulus (González-García et al., 2017a; Muhle-Karbe et  
77 al., 2017) and rule identity (Ruge et al., 2019), or altered similarity within to-be-  
78 implemented S-R associations (Bourguignon et al., 2018; Palenciano et al.,  
79 2019b). Although these results reveal unique signatures of instruction  
80 implementation, they are agnostic regarding the functional representational state  
81 underlying such effects, that is, the extent to which they capture a contribution of  
82 procedural and declarative signals. Furthermore, previous approaches were not  
83 able to eliminate the contribution of domain-general processes, such as arousal or  
84 attention, which could potentially drive some of the differences between  
85 implementation and other experimental conditions. Therefore, currently, it cannot  
86 be discerned whether such implementation state is uniquely supported through the  
87 proposed procedural codes, or whether it additionally preserves task content in an  
88 independent, declarative format. Furthermore, the specific contribution of these two  
89 representational formats to successful behavior remains unknown.

90 Here, we used a canonical template tracking procedure to capture whether  
91 different signals governed FPN activity during the prioritization of novel instructions  
92 (Brass et al., 2017). Using data from two independent localizers that encouraged  
93 either a declarative or action-oriented maintenance of novel instructions, we  
94 derived instruction-specific multivariate patterns of activity in declarative and  
95 procedural formats, respectively. We then assessed the contribution of these  
96 canonical declarative and procedural templates prior to task execution. Importantly,

97 this partialling logic allowed to determine the format-specific contribution of  
98 procedural and declarative representational formats and to partial out the  
99 contribution of domain-general processes.

100

## 101 **MATERIALS AND METHODS**

102 Methods are reported, when applicable, in accordance with the Committee on Best  
103 Practices in Data Analysis and Sharing (COBIDAS) report (Nichols et al., 2017).

### 104 *Participants*

105 Thirty-two participants (mean age = 23.16, range = 19-33; 20 females, 12 males)  
106 recruited from the participants' pool from Ghent University participated in exchange  
107 of 40 euros. They were all right-handed (confirmed by the Edinburgh handedness  
108 inventory), clinically healthy and MRI-safe. The study was approved by the UZ  
109 Ghent Ethics Committee and all participants provided informed consent before  
110 starting the experiment. Of the initial 32 participants, 3 were excluded after  
111 acquisition (1 participant performed at chance during the task; 1 participant had an  
112 error rate of 1 in catch trials (see below); 1 participant's within-run head movement  
113 exceeded voxel size), resulting in a final sample of 29 participants. Due to an  
114 incomplete orthogonalization of the cued and uncued S-R pairings, the first three  
115 participants were excluded from multivariate analyses (n = 26).

### 116 *Apparatus, stimuli, and procedure*

117 S-R associations were created by combining images with words that indicated the  
118 response finger. Each S-R association was presented just once during the entire  
119 experiment to prevent the formation of long-term memory traces (Meiran et al.,  
120 2015a). Given this prerequisite, images of animate (non-human animals) and  
121 inanimate (vehicles and instruments) items were compiled from different available  
122 databases (Brady et al., 2013, 2008; Brodeur et al., 2014; Griffin et al., 2006;  
123 Konkle et al., 2010), creating a pool of 1550 unique pictures (770 animate items,  
124 780 inanimate). To increase perceptual similarity and facilitate recognition, the  
125 background was removed from all images, items were centered in the canvas, and  
126 images were converted to black and white.

127 The response dimension was defined by the combination of a word (“index” or  
128 “middle”) and the position of the mapping in the encoding screen. For instance, if  
129 an S-R pair containing the word “index” was displayed on the left-hand side of the  
130 screen, this informed participants that the correct response associated with that  
131 particular stimulus would be “*left index*”. This allowed us to have 2 mappings on  
132 screen that involved the same (stimulus and) *response category* (e.g. index finger)  
133 but different effectors (e.g. *left index finger* vs *right index finger*).

134 Importantly, even though specific S-R associations were presented only once  
135 throughout the experiment, they could be grouped depending on the specific  
136 combination of stimulus and response dimensions. Specifically, the combination of  
137 the 2 stimulus dimensions (animate/inanimate items) and the 2 response  
138 dimensions (index/middle finger) lead to 4 finger-animacy pairings: S-R 1

139 (animate-index), S-R 2 (inanimate-index), S-R 3 (animate-middle), and S-R 4  
140 (inanimate-middle).

141 In the main task, each trial started with an encoding screen (5000 ms) that  
142 displayed 4 S-R associations. The two mappings on the upper half of the encoding  
143 screen belonged to one S-R pairing, and the other two belonged to another S-R  
144 pairing. Immediately after the encoding screen, a retro-cue appeared. Informative  
145 retro-cues (75% of trials) consisted of an arrow centered in the middle of the  
146 screen pointing either upwards or downwards. Therefore, informative retro-cues  
147 did not select a specific S-R mapping but rather two mappings belonging to the  
148 same S-R pairing (e.g. “animate - index finger”). Such grouping was crucial for  
149 analysis purposes since it allowed us to identify the *selected* S-R pairing, as well  
150 as the *unselected* category that was initially encoded but could be dropped from  
151 working memory after the retro-cue. Additionally, for each trial, we identified the *not*  
152 *presented* S-R pairings, which would serve as empirical baseline for our template  
153 tracking analysis (see below). In contrast, neutral retro-cues did not select any  
154 mapping. The retro-cue was displayed for 1000 ms and was followed by a fixation  
155 point (cue-target interval; CTI), which duration was jittered following a pseudo-  
156 logarithmic distribution (mean duration = 2266 ms, SD = 1276 ms, range = [600-  
157 5000]). Directly after the CTI, a target was on screen for 1500 ms. Target screens  
158 displayed the image belonging to one of the selected mappings, prompting  
159 participants to execute the associated response by pressing the corresponding  
160 button in an MRI-compatible button box. In neutral trials, the target could be the  
161 stimulus of any of the 4 S-R encoded mappings. Additionally, in ~6% of trials, a



162 catch target appeared. This consisted of a new image, different from any of the  
163 encoded stimuli, to which participants had to answer by pressing the 4 available  
164 buttons in the response box. Catch trials were included to ensure that participant  
165 encoded all four S-R associations and were equally likely after an informative and  
166 a neutral retro-cue. Last, after the target screen, a fixation point was shown  
167 between trials (inter-trial interval, ITI) for a jittered duration (following the same  
168 parameters as the CTI jitter). Each trial lasted on average 12 seconds. The  
169 sequence of trial events is depicted in Figure 1.

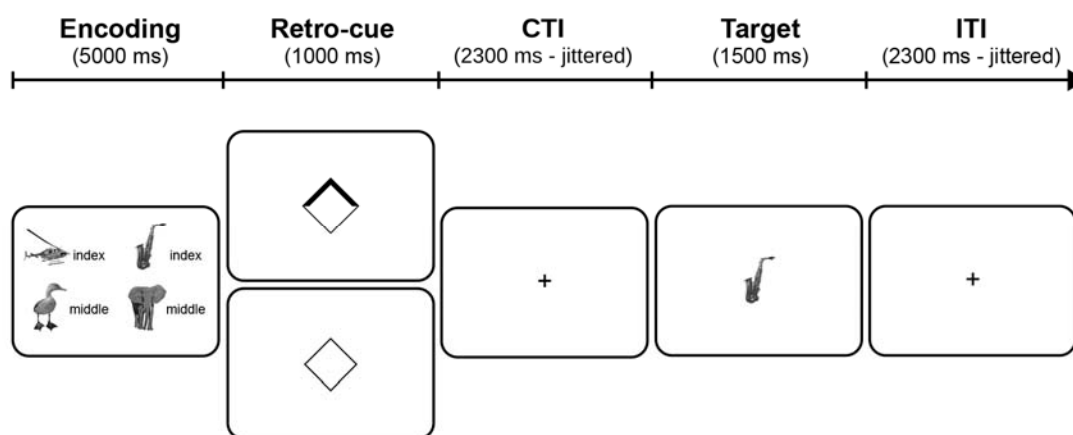

170  
171 **Figure 1.** Behavioral paradigm. On each trial, participants first encoded four novel  
172 S-R mappings consisting in the association between an (animate or inanimate)  
173 item and a response (index or middle fingers; response hand defined by the  
174 position of the mapping on the screen; e.g. “helicopter-index” on the left-hand side  
175 of the screen requested participants to press the *left* index if the target screen  
176 displayed a helicopter). After the encoding screen, an informative retro-cue (75%

177 of the trials) signaled the relevance of two of the mappings. In the remaining 25%  
178 of trials, a neutral retro-cue appeared, and none of the mappings were cued. Last,  
179 a target stimulus prompted participants to provide the associated response (in this  
180 example, “right index” finger press).

181

182 The main task was divided into 4 runs. Each run contained 51 trials (48 regular and  
183 3 catch trials). Of the 48 regular trials, 75% contained an informative retro-cue, and  
184 the remaining trials displayed neutral retro-cues. The S-R pairings selected and  
185 unselected by the retro-cue were fully counterbalanced, resulting in 36 trials per  
186 pairing across the entire experiment. For instance, there were 36 trials in which  
187 Pairing 1 mappings were selected by the retro-cue. Of these 36 trials, in one third,  
188 the unselected mappings (that is, mappings shown in the encoding screen but not  
189 selected by the retro-cue) belonged to Pairing 2, another third to Pairing 3, and the  
190 last third to Pairing 4. Each run lasted around 10 minutes, and the main task,  
191 containing 204 trials, lasted around 40 minutes in total. Prior to the main task,  
192 outside of the scanner, participants performed a practice session with trials  
193 following the same structure described above with the exception that feedback was  
194 included to help familiarization. The practice session was structured in blocks of 11  
195 trials. Participants performed these blocks until they achieved at least 9 correct  
196 responses. S-R mappings used during the practice were never used again.

197 After the main task, participants performed two localizers to obtain an independent  
198 canonical representation of each S-R pairing in the two formats of interest. The two  
199 localizers were aimed at encouraging either a primarily procedural or a primarily

200 declarative coding of new S-Rs. Although a localizer eliciting uniquely one of these  
201 two types of coding is hard to conceive (for instance, one could claim a declarative  
202 representation of the elements of a task is required before any procedural  
203 representation can emerge (Formica et al., 2020a)), our pattern analysis (see  
204 below) capitalized on the specific engagement of procedural and declarative  
205 strategies encouraged by each of these localizers.

206 The structure of the task was almost identical in the two localizers. In both  
207 localizers, trials started with an encoding screen (2000 ms) that contained two  
208 mappings of the same S-R pairing, followed by an inter-stimulus interval of jittered  
209 duration (same parameters as the jitters in the main task). Importantly, in both  
210 localizers, even though the two encoded mappings belonged to the same S-R  
211 pairing, they specified different effectors (for instance: “if you see an elephant,  
212 press left index finger; if you see a tiger, press right index finger), and therefore  
213 participants needed to maintain both mappings rather using other strategies, such  
214 as remembering 2 images and one response.

215 Last, a target screen appeared (1500 ms) followed by a jittered ITI. The target  
216 screen differed in the two localizers and was inspired by previous studies  
217 investigating the dissociation of implementing vs. memorizing new instructions  
218 (Liefoghe et al., 2012; Liefoghe and De Houwer, 2018; Muhle-Karbe et al.,  
219 2017). In the procedural localizer, the target consisted of a single image that  
220 prompted participants to execute the associated response. Although this  
221 configuration renders the procedural localizer similar to the main task, it remained  
222 different in a crucial aspect. Whereas in the procedural localizer participants could

223 prepare for executing one of the 2 mappings directly in the encoding screen, in the  
224 main task this highly action-oriented coding format was strategically optimal only  
225 after the selection process elicited by the retro-cue. Since our analyses focused on  
226 this moment of the main task, the localizer thus provided a means to test whether  
227 the selection of a novel S-R from working memory engaged similar procedural  
228 signals.

229 The declarative localizer, in contrast to the procedural one, displayed a memory  
230 target consisting of one image and one response finger (e.g. left index).

231 Participants were trained to answer whether the displayed mapping was correct  
232 (same association as the encoded one) or incorrect (different association) by  
233 pressing both left-hand buttons (when “correct”) or both right-hand buttons (when  
234 “incorrect”). Therefore, in the memorization localizer, participants never had to  
235 prepare to execute the encoded mapping but rather just maintain its information.

236 As in the main task, catch trials consisted of new images, to which participants had  
237 to respond by pressing all 4 available buttons. Each trial lasted around 8 s on  
238 average, and each localizer contained 66 trials (15 per S-R pairing + 6 catch trials),  
239 resulting in a total of 9 minutes per localizer. Given that the task demands for the  
240 procedural localizer were more similar to the main task, this localizer was  
241 performed always before the declarative localizer, which required more detailed  
242 explanation to participants. Importantly, the nature of our template tracking  
243 approach (see below) accounted for any potential order confound in such analysis,  
244 since template activation is measured against an empirical within-localizer  
245 baseline, and not directly compared between localizers.

246 All tasks were presented in PsychoPy 2 (Peirce, 2007) running on a Windows PC  
247 and back-projected onto a screen located behind the scanner. Participants  
248 responded using an MRI-compatible button box on each hand (each button box  
249 contained two buttons, on which participants placed their index and middle  
250 fingers).

### 251 *Data acquisition and preprocessing*

252 Imaging was performed on a 3T Magnetom Trio MRI scanner (Siemens Medical  
253 Systems, Erlangen, Germany), equipped with a 64-channel head coil. T1 weighted  
254 anatomical images were obtained using a magnetization-prepared rapid acquisition  
255 gradient echo (MP-RAGE) sequence (TR=2250 ms, TE=4.18 ms, TI=900 ms,  
256 acquisition matrix=256 x 256, FOV=256 mm, flip angle=9°, voxel size=1 x 1 x 1  
257 mm). Moreover, 2 field map images (phase and magnitude) were acquired to  
258 correct for magnetic field inhomogeneities (TR=520 ms, TE1=4.92 ms, TE2=7.38  
259 ms, image matrix=70 x 70, FOV=210 mm, flip angle=60°, slice thickness=3 mm,  
260 voxel size=3 x 3 x 2.5 mm, distance factor=0%, 50 slices). Whole-brain functional  
261 images were obtained using an echo planar imaging (EPI) sequence (TR=1730  
262 ms, TE=30 ms, image matrix=84 x 84, FOV=210 mm, flip angle=66°, slice  
263 thickness=2.5 mm, voxel size=2.5 x 2.5 x 2.5 mm, distance factor=0%, 50 slices  
264 with slice acceleration factor 2 (Simultaneous Multi-Slice acquisition)). Slices were  
265 orientated along the AC-PC line for each subject.

266 For each run of the main task, 373 volumes were acquired, whereas 330 volumes  
267 were acquired during each localizer. In all cases, the first 8 volumes were  
268 discarded to allow for (1) signal stabilization, and (2) sufficient learning time for a

269 noise cancellation algorithm (OptoACTIVE, Optoacoustics Ltd, Moshav Mazor,  
270 Israel). Before data preprocessing, DICOM images obtained from the scanner  
271 were converted into NIfTI files using HeuDiConv  
272 (<https://github.com/nipy/heudiconv>), in order to organize the dataset in accordance  
273 with the BIDS format (Gorgolewski et al., 2017). Further data preprocessing was  
274 performed in SPM12 (v7487) running on MATLAB R2016b. First, anatomical  
275 images were defaced to ensure anonymization. They were later segmented into  
276 gray matter, white matter and cerebro-spinal fluid components using SPM default  
277 parameters. In this step, we obtained inverse and forward deformation fields to  
278 later (1) normalize functional images to the atlas space (forward transformation)  
279 and (2) transform ROIs from the atlas on to the individual, native space of each  
280 participant (inverse transformation). Regarding functional images, preprocessing  
281 included the following steps in the following order: (1) Images were realigned and  
282 unwarped to correct for movement artifacts (using the first scan as reference slice)  
283 and magnetic field inhomogeneities (using fieldmaps); (2) slice timing correction;  
284 (3) coregistration with T1 (intra-subject registration): rigid-body transformation,  
285 normalized mutual information cost function; 4<sup>th</sup> degree B-spline interpolation; (4)  
286 registration to MNI space using forward deformation fields from segmentation: MNI  
287 2mm template space, 4<sup>th</sup> degree B-spline interpolation; and (5) smoothing (8-mm  
288 FWHM kernel). Multivariate analyses were conducted on the unsmoothed,  
289 individual subject's functional data space and results were later pooled across  
290 participants for region-of-interest analyses.

291 *Experimental design and statistical analysis*

292 Our main task design consisted of two within-subject factors orthogonally  
293 manipulated: retro-cue status (informative vs. neutral) and selected S-R pairing.  
294 Regarding behavioral data analyses, we used JASP (JASP Team, 2018) to  
295 perform two-tail paired t-tests comparing reaction times and error rates for trials  
296 with informative vs. neutral trials (collapsing across selected S-R pairing).

297 *General Linear Model (GLM) estimations and mass-univariate analyses.*

298 Four GLMs were estimated for each participant in SPM. First, a GLM was used to  
299 assess changes in activation magnitude between informative and neutral retro-  
300 cues during the main task. A model was constructed including, for each run,  
301 regressors for the encoding screen (zero duration), informative/neutral retro-cues  
302 (with duration), informative/neutral CTI (with duration), target (zero duration) and  
303 ITI interval (with duration). Trials with errors were included as a different regressor  
304 that encompassed the total duration of the trial. All regressors were convolved with  
305 a hemodynamic response function (HRF). At the population level, parameter  
306 estimates of each regressor were entered into a mixed-effects analysis. To correct  
307 for multiple comparisons, first we identified individual voxels that passed a 'height'  
308 threshold of  $p < 0.001$ , and then the minimum cluster size was set to the number of  
309 voxels corresponding to  $p < 0.05$ , FWE-corrected. This combination of thresholds  
310 has been shown to control appropriately for false-positives (Eklund et al., 2016). A  
311 second GLM was estimated on the non-normalized and unsmoothed main task  
312 data for all multivariate analyses. This GLM contained beta estimates that specified  
313 the cued/uncued S-R pairings during informative retro-cues. For each participant  
314 and run, a model was built including the following regressors: encoding (zero

315 duration), neutral retro-cues (with duration), targets (zero duration), CTI and ITI  
316 (with duration). For informative retro-cues, a regressor that encompassed the total  
317 duration of the retro-cue was created for each S-R pairing combination (e.g.  
318 CuedPairing1\_UncuedPairing2), resulting in a total of 12 regressors (3 per finger-  
319 animacy pairing). Errors were included as a different regressor encompassing the  
320 full duration of the trial. Last, a third and fourth GLMs were performed on the non-  
321 normalized and unsmoothed data from the two localizers. For each localizer, we  
322 built a model that contained regressors for the encoding screen (zero duration),  
323 encoding-target interval (ISI, with duration) for each S-R pairing (total of 4  
324 regressors), target (zero duration), ITI (with duration), and errors (full trial). As in  
325 the previous GLM, these models were not used in a population-level GLM and  
326 were estimated for later use in the canonical template tracking procedure.

327 *Multivariate pattern analysis (MVPA)*. MVPA was performed on the beta  
328 images of the second GLM using The Decoding Toolbox (Hebart et al., 2015)  
329 (v3.99). To assess the representation of cued S-R pairings during implementation,  
330 we carried out ROI-based one-vs-one multiclass decoding of S-R pairings. In each  
331 fold of the leave-one-run-out procedure, we trained a classifier (linear support  
332 vector machine (SVM); regularization parameter = 1) on the identity of the *cued* S-  
333 R pairing using all informative retro-cue betas but four (one from each class). The  
334 classifier was then tested on the remaining samples. Thus, the held-out data in  
335 each cross-validation fold was from different experimental runs to the training data.  
336 The accuracy was averaged across folds. Only one decoding was performed per  
337 ROI, using all voxels. To remove any potential magnitude difference between



338 classes, we z-scored the values of each condition across voxels before the  
339 analysis (therefore, each condition that entered the analysis had a mean activation  
340 of 0 and an s.d. of 1). We then repeated the same procedure but now training and  
341 testing the classifier on the identity of the *uncued* S-R pairing.

342         Statistics of decoding analyses followed a permutation approach  
343 (Combrisson and Jerbi, 2015). For each ROI, we computed a null distribution by  
344 repeating the decoding protocol 1000 times swapping the labels of the true  
345 classes. We then established the chance level for a given participant as the mean  
346 value of this null distribution. To assess significance at the population level, we first  
347 compared accuracy minus chance scores of all participants against 0, using a one-  
348 sample t-test. Then, we computed the empirical null distribution of t-values by, on  
349 each of 1000 permutations, randomly flipping the sign of each individual score and  
350 performing a new t-test. Finally, an effect was considered significant if the  
351 observed t-value was larger than 95% of the t-values in the null distribution (thus,  
352 significance level =  $p < 0.05$ ).

353         *Canonical template tracking procedure.* The main goal of the current study  
354 was to assess the contribution of procedural and declarative signals during  
355 instruction implementation. To do so, we followed a canonical template tracking  
356 procedure (Wimber et al., 2015) (see Figure 4 for a visual representation of the  
357 analysis). The main rationale of this analysis was (1) to obtain canonical  
358 representations of the different S-R pairings under the two different formats of  
359 interest (procedural and declarative) from the ISI of the localizers, and later (2)  
360 estimate the extent of variance during implementation in the main task uniquely

361 explained by each of these representations. Importantly, this analysis was aimed at  
362 obtaining evidence for the presence (or lack thereof) of procedural and/or  
363 declarative signals and not to compare their strengths.

364 The functional localizers performed after the main task allowed us to obtain a  
365 participant-specific canonical pattern of activation for each S-R pairing in  
366 declarative and procedural formats. All patterns were derived from beta weights of  
367 the GLMs described in the section General Linear Model estimations. Prior to  
368 analysis, betas were converted into t-maps and, given the impact of noise on  
369 correlation estimates, we performed multivariate noise normalization on each  
370 individual run of the main task and template separately (Walther et al., 2016). To  
371 do so, we used the residuals of each participant's GLMs to estimate the noise  
372 covariance between voxels. These estimates, regularized by the optimal shrinkage  
373 factor (Ledoit and Wolf, 2004), were used to spatially pre-whiten the t-maps.

374 To measure the contribution of the canonical patterns during the main task, for  
375 each region, we computed the semi-partial correlation between the pattern of  
376 activity during the retro-cue in the main task and the canonical template of each S-  
377 R pairing in the two formats. Semi-partial correlations make it possible to estimate  
378 how much *unique* variance the independent variable (e.g. the residuals of  
379 regressing the procedural template of one S-R pairing on the declarative template  
380 of the same pairing) explains in relation to the total variance in the dependent  
381 variable (e.g. activity during the main task), and are thus more practically relevant  
382 than partial correlations because they are scaled to the total variability in the

383 dependent variable, rather than to the variance unaccounted for by the rest of  
384 variables.

385 An important feature of the described template tracking approach is that it was  
386 optimized to detect whether the two signals of interest were independently  
387 accounting for unique variance during implementation, and not to compare the  
388 strength of these two signals. Therefore, the raw semi-partial correlation magnitude  
389 of each template with the task was of no interest. Only the relative difference  
390 between correlation of cued, uncued S-Rs, and the empirical baseline provided by  
391 the not-presented S-R was informative for our hypotheses. Since our GLM  
392 included different retro-cue regressors depending on the selected S-R pairing, we  
393 could obtain a specific activation value for cued, uncued and not-presented  
394 pairings. Importantly, semi-partial correlations were used to obtain the amount of  
395 variance shared between the main task and a template of an S-R pairing (e.g. in  
396 procedural state) that is not explained by the template of that same pairing in the  
397 opposite state (e.g. declarative). As such, this approach is sensitive to content-  
398 specific signals and rules out the relative contribution of domain general processes  
399 that are shared between the two localizers, ensuring that any significant result  
400 would only capture the activation of S-R information in a specific format. To  
401 statistically test the boost of cued information, we first normalized the semi-partial  
402 correlation scores by using Fisher's z transformation and then performed paired t-  
403 tests between the cued, uncued and not-presented S-R pairings activation (FDR-  
404 corrected for multiple comparisons).

405 *Region-of-interest (ROI) definition*

406 Frontoparietal ROIs were obtained from a parcellated map of the multiple-demand  
407 network (Fedorenko et al., 2013). Specifically, frontal ROIs comprised the inferior  
408 and middle frontal gyrus regions of the map, and parietal ROIs comprised the  
409 inferior and superior parietal cortex regions. All ROIs were registered back to the  
410 native space of each subject using the inverse deformation fields obtained during  
411 segmentation.

412 We obtained a ventral visual cortex ROI by extracting the following regions in the  
413 WFU pickatlas software (<http://fmri.wfubmc.edu/software/PickAtlas>): bilateral  
414 inferior occipital lobe, parahippocampal gyrus, fusiform gyrus, and lingual gyrus (all  
415 bilateral and based on AAL definitions). The primary motor cortex ROI was also  
416 obtained using WFU pickatlas by extracting the bilateral M1 region.

417

## 418 **RESULTS**

### 419 **S-R prioritization enhances instruction execution**

420 Analysis of participants' behavioral performance revealed that retro-cues helped  
421 participants in prioritizing novel S-Rs. Specifically, participants were faster ( $t_{28,1} =$   
422  $13.51$ ,  $p < 0.001$ , Cohen's  $d = 2.51$ ; Fig. 2a) and made less errors ( $t_{28,1} = 7.96$ ,  $p <$   
423  $0.001$ , Cohen's  $d = 1.47$ ; Fig. 2b, left panel) in trials with informative retro-cues,  
424 compared to neutral. Participants were slower in catch trials compared to  
425 informative ( $t_{28,1} = 11.68$ ,  $p < 0.001$ , Cohen's  $d = 2.17$ ) and neutral trials ( $t_{28,1} =$   
426  $3.36$ ,  $p = 0.002$ , Cohen's  $d = 0.63$ ). This longer RT probably reflected the  
427 requirement to disengage from the encoded S-Rs and respond correctly to the

428 new, non-encoded image. In line with this interpretation, responses to catch  
429 images after a neutral retro-cue ( $M = 981$  ms,  $SD = 122$ ) were slower than after an  
430 informative retro-cue ( $M = 909$  ms,  $SD = 95$ ;  $t_{27,1} = 3.81$ ,  $p < 0.001$ , Cohen's  $d =$   
431  $0.72$ ). This cost of WM load only modulated RTs: error rates for catch trials were  
432 lower than in neutral trials ( $t_{28,1} = 4.83$ ,  $p < 0.001$ , Cohen's  $d = 0.90$ ), and not  
433 significantly different from informative trials ( $t < 1$ ), suggesting that participants  
434 were able to detect new images and, therefore, that they successfully encoded all  
435 mappings of the encoding screen.

436 Regarding performance during the two localizers, we expected more successful  
437 behavior during the procedural localizer task, given the simpler nature of the task.  
438 Accordingly, participants responded faster ( $t_{28,1} = 25.75$ ,  $p < 0.001$ , Cohen's  $d =$   
439  $4.78$ ) and made less errors ( $t_{28,1} = 3.99$ ,  $p < 0.001$ , Cohen's  $d = 0.74$ ) during the  
440 procedural localizer (RT  $M = 652$  ms,  $SD = 84$ ; ER  $M = 0.15$ ,  $SD = 0.1$ ), compared  
441 to declarative one (RT  $M = 1042$ ,  $SD = 75$ ; ER  $M = 0.25$ ,  $SD = 0.08$ ).

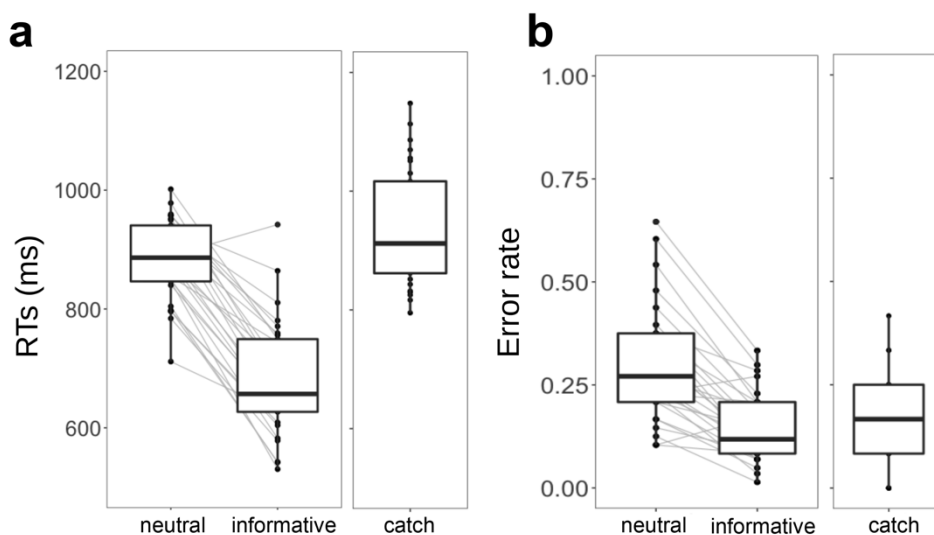

442

443 **Figure 2.** Behavioral results. **(a)** Reaction times in neutral, informative, and catch  
444 trials. **(b)** Error rates in neutral, informative, and catch trials. The thick line inside  
445 box plots depicts the second quartile (median) of the distribution ( $n = 29$ ). The  
446 bounds of the boxes depict the first and third quartiles of the distribution. Whiskers  
447 denote the 1.5 interquartile range of the lower and upper quartile. Dots represent  
448 individual subjects' scores. Grey lines connect dots corresponding to the same  
449 participant in two different experimental conditions.

450

### 451 **Identifying novel S-R selection activity**

452 As a first step, we investigated which brain regions were predominantly involved in  
453 the selection of instructions from working memory (WM). Based on recent  
454 experimental results (González-García et al., 2020; Myers et al., 2018; Yu and  
455 Postle, 2018) and theoretical models of WM (Myers et al., 2017), we assumed that  
456 selection would prioritize relevant S-R associations into a behavior-optimized state,  
457 akin to implementation. As such, retro-cues served as a tool to locate in time the  
458 moment after initial encoding in which implementation-specific signals should be  
459 magnified in detriment of encoded but uncued S-Rs, which could be potentially  
460 dropped from WM. Specifically, we predicted that if such prioritization of S-Rs is  
461 indeed similar to instruction implementation, then the FPN should be particularly  
462 engaged in trials with informative retro-cues (Bourguignon et al., 2018; González-  
463 García et al., 2017a; Jackson and Woolgar, 2018; Muhle-Karbe et al., 2017;  
464 Palenciano et al., 2019a; Woolgar et al., 2015). We thus established a set of a  
465 priori candidate regions that encompassed frontal (inferior and middle frontal gyri)

466 and (inferior and superior) parietal cortices (see Fig. 3b, and the Region-of-interest  
467 definition section in the Methods). We then performed a whole-brain analysis to  
468 find regions sensitive to S-R selection (defined as informative vs. neutral retro-  
469 cues) in their overall activation magnitude using a general linear model (GLM). We  
470 found that informative retro-cues elicited significantly higher activity in regions of  
471 the FPN, including the inferior and middle frontal gyri, inferior and superior parietal  
472 cortices, as well as regions outside the FPN, such as the lateral occipital cortex  
473 (Fig. 3a, primary voxel threshold [ $p < 0.001$  uncorrected] and cluster-defining  
474 threshold [FWE  $p < .05$ ]). Overall, the resulting statistical map roughly overlap with  
475 the set of a priori defined regions of interest (ROIs; Fig. 3b), confirming the  
476 involvement of the FPN in S-R selection and, more broadly, providing initial  
477 evidence that such prioritization could engage similar mechanisms as instruction  
478 implementation.

479 Next, we predicted that the prioritization state would modulate the representation of  
480 S-R pairings. To test this hypothesis, we performed two similar multivariate  
481 decoding analyses in the 4 FPN ROIs. First, we tested if at the moment of the  
482 retro-cue the patterns of activity in these four regions carried information about the  
483 specific finger-animacy pairing of the cued S-R. We found significant decoding in  
484 the right PFC and bilateral parietal ROIs (permutation-based one-sample t-tests, all  
485  $ps < 0.02$ ), and not significant decoding in the left PFC ( $t_{25,1} = 1.69$ ,  $p = 0.1$ ),  
486 although a Bayesian t-test suggested no conclusive evidence for neither the  
487 alternative nor the null hypothesis in this ROI ( $BF_{10} = 0.45$ ). Next, we tested the  
488 extent to which the FPN also carried information about the encoded, but not cued

489 pairing. In contrast to the previous results, we expected these pairings not to be  
490 decodable, given that uncued mappings could be dropped from memory. In line  
491 with our prediction, decoding did not reach significance in any of the ROIs (all  $p$ s >  
492 0.06), and a Bayesian counterpart of the analysis provided support for the null  
493 hypothesis (in left DLPFC and bilateral parietal ROIs, all BFs < 0.3) and  
494 inconclusive evidence in the right DLPFC ( $BF_{10} = 0.58$ ). Finally, we directly  
495 compared the decoding accuracies for the cued and uncued pairings. This analysis  
496 revealed significantly stronger decoding of the cued pairing compared to the  
497 uncued one in right PFC and bilateral parietal cortices (permutation-based paired t-  
498 tests, all  $p$ s < 0.02, Fig. 3c; see Table 1 for individual statistics, p-values and  $BF_{10}$   
499 estimates).

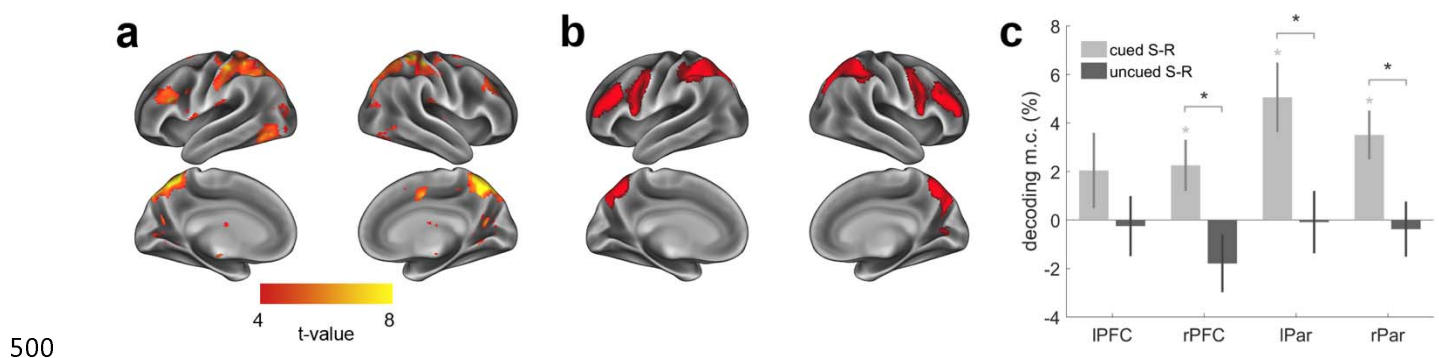

501 **Figure 3.** S-R selection induced changes in frontoparietal neural activity. **(a)** GLM  
502 contrast of informative > neutral retro-cue trials. Warm colors show regions with  
503 significantly higher activity magnitude during informative compared to neutral retro-  
504 cues (primary voxel threshold [ $p < 0.001$  uncorrected] and cluster-defining  
505 threshold [FWE  $p < .05$ ]). **(b)** Set of regions-of-interest defined prior to analyses,  
506 encompassing frontal (inferior and middle frontal gyri) and (inferior and superior)  
507 parietal cortices. **(c)** Mean S-R pairing decoding (minus empirical chance level)



508 within each region of interest. Error bars denote between-participants s.e.m. Grey  
 509 asterisks denote accuracies significantly above chance level (permutation-based  
 510 one-sample t-test, 1k permutations). Black asterisks denote significantly higher  
 511 accuracies for cued compared to uncued S-R pairings (permutation-based paired t-  
 512 test, 1k permutations).

|                   | ROI    | t       | p       | BF <sub>10</sub> |
|-------------------|--------|---------|---------|------------------|
| <b>cued</b>       | ldlpfc | 1.3088  | 0.108   | 0.445            |
|                   | rdlpfc | 2.1274  | 0.02    | 1.412            |
|                   | lpar   | 3.5149  | < 0.001 | 21.601           |
|                   | rpar   | 3.4638  | < 0.001 | 19.32            |
| <b>uncued</b>     | ldlpfc | -0.2089 | 0.406   | 0.211            |
|                   | rdlpfc | -1.5223 | 0.068   | 0.575            |
|                   | lpar   | -0.0739 | 0.454   | 0.208            |
|                   | rpar   | -0.336  | 0.384   | 0.218            |
| <b>comparison</b> | ldlpfc | 1.1338  | 0.142   | 0.632            |
|                   | rdlpfc | 2.4384  | 0.01    | 4.794            |
|                   | lpar   | 2.5978  | 0.01    | 6.475            |
|                   | rpar   | 2.2243  | 0.018   | 3.255            |

513

514 **Table 1.** Statistics, p-values and BF<sub>10</sub> estimates for ROI-based decoding results.  
 515 BF<sub>10</sub> > 3 suggests support for the alternative hypothesis, whereas BF<sub>10</sub> < 0.3  
 516 indicates support for the null hypothesis.

517

### 518 **Tracking format-unique S-R patterns**

519 Altogether, these results show that instruction prioritization has a profound impact  
 520 on FPN activity, impacting the representation of selected and irrelevant S-Rs.  
 521 However, similarly to previous studies, they are agnostic regarding the nature of  
 522 the signals underlying such effect. The main goal of our study was to test whether

523 both declarative and procedural signals contributed to the representational  
524 organization of FPN activity during instruction implementation. To do so, we  
525 implemented a canonical template tracking procedure that allowed us to estimate  
526 neural activations of specific S-R pairings under the two functional formats of  
527 interest (see Figure 4, for a visual representation of the procedure, and Methods,  
528 for a detailed description of the analysis). Importantly, this approach revealed the  
529 amount of shared variance between task data and a given template (e.g. S-R  
530 pairing 1 in procedural state) that is not explained by the same template in the  
531 alternative state (e.g. S-R pairing 1 in declarative state). Therefore, processes  
532 common to both localizers (e.g. arousal, domain-general attention and/or task  
533 preparation) cannot inflate correlations, and any significant enhancement from  
534 baseline rather reflects the activation of S-R-specific information in a specific  
535 format during the main task.

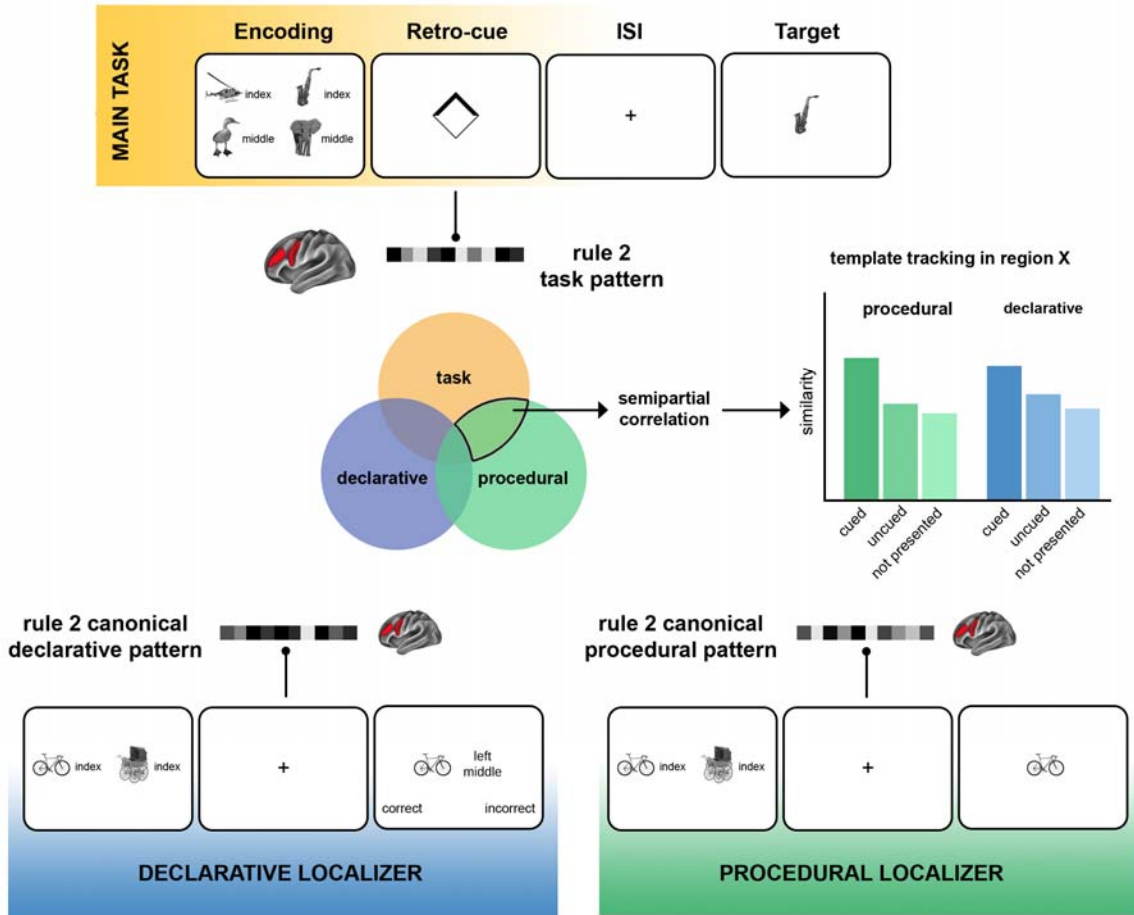

536

537 **Figure 4.** Schematic of the canonical template tracking procedure. For each region  
 538 of interest, we extracted the pattern of activity of specific S-R pairings during  
 539 informative retro-cues (upper panel, in yellow) and computed similarity with  
 540 canonical templates of such pairings in declarative (bottom left, in blue) and  
 541 procedural (bottom right, in green) formats, obtained in two separate localizers.  
 542 Importantly, similarity was assessed via semi-partial correlations, obtaining the  
 543 proportion of uniquely shared variance between task and template data (middle,  
 544 Venn diagram) of the cued, uncued and not-presented S-R pairings, which provide  
 545 an empirical baseline. Graphs represent a hypothetical set of results, in which  
 546 implementation recruits non-overlapping procedural and declarative

547 representations of cued S-R pairing. This informational boost, relative to baseline  
548 (not-presented S-R pairings), is superior to that of the uncued pairing.

549

550 To validate this procedure outside the FPN, we created an ROI comprising the  
551 primary motor cortex, where implementation should be dominated by action-  
552 oriented signals and no declarative information about S-R pairings is expected.  
553 The results obtained (Fig. 5) matched the predictions, revealing a specific  
554 enhancement of procedural information of the cued pairing compared to the  
555 uncued ( $t_{25,1} = 4.08$ ,  $p < 0.001$ , Cohen's  $d = 0.80$ ), and critically, to the empirical  
556 baseline defined by the not-presented pairings ( $t_{25,1} = 5.45$ ,  $p < 0.001$ , Cohen's  $d =$   
557  $1.07$ ). No activation of the uncued S-R pairing was found ( $t_{25,1} = 1.32$ ,  $p = 0.2$ ,  
558 Cohen's  $d = 0.26$ ). As predicted, no differences between cued, uncued and  
559 baseline pairings were found in declarative signals (all  $ts < 1.53$ , all  $ps > 0.14$ ).

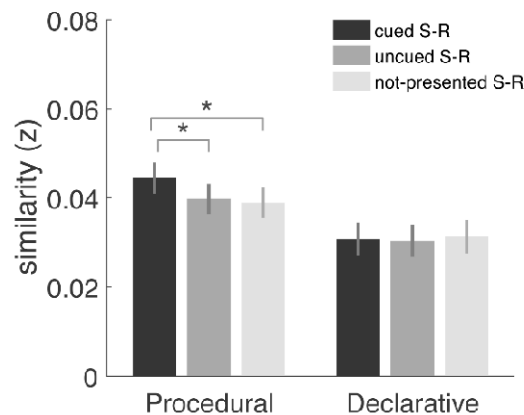

560

561 **Figure 5.** Template tracking procedure results in the primary motor cortex. Bars  
562 represent the normalized semi-partial correlation between task data and the  
563 procedural and declarative templates of cued, uncued and not presented S-R

564 pairings. Error bars denote within-participants s.e.m (Morey, 2008). Asterisks  
565 denote significant differences ( $p < 0.05$ , paired t-test).

566

567 To further assess the sensitivity of our tracking approach, we repeated the analysis  
568 on the beta estimates obtained during the encoding screen of the trial, where no  
569 differences should be found between cued and uncued mappings. Given the  
570 results during the retro-cue period, here we focused on procedural activation  
571 scores. We then entered the template activation scores of the encoding and retro-  
572 cue events in a repeated-measures ANOVA with the factors S-R type (cued vs.  
573 uncued) and Event (Encoding vs. Retro-cue). Importantly, the activation scores  
574 entered were the scores for cued and uncued relative to not-presented mappings,  
575 therefore not-presented mappings were not included as a separate level in the S-R  
576 type factor of the ANOVA. This analysis yielded a significant S-R type \* Event  
577 interaction ( $F_{25,1} = 10.61$ ,  $p = 0.003$ ,  $\eta^2_p = 0.3$ ). The interaction effect revealed a  
578 difference in activation of cued and uncued S-Rs only during the retro-cue screen  
579 ( $F = 16.68$ ,  $p < 0.001$ ), whereas no significant differences were found during the  
580 encoding screen ( $F < 1$ ,  $p = 0.67$ ). Furthermore, it revealed a boost in the  
581 activation of cued mappings during the retro-cue, compared to the encoding  
582 screen ( $F = 4.9$ ,  $p = 0.036$ ). No difference was found for the uncued S-Rs ( $F = 2.5$ ,  
583  $p = 0.125$ ), although activation was numerically weaker during the retro-cue ( $M =$   
584  $0.001$ ,  $SD = 0.004$ ) than during the encoding screen ( $M = 0.003$ ,  $SD = 0.006$ ). To  
585 directly test whether activation for cued and uncued during the retrocue was  
586 greater than during the encoding screen, we performed a new ANOVA in which we

587 introduced direct scores (not relative to baseline), therefore including not-  
588 presented S-R as another level of the S-R type factor. This ANOVA confirmed the  
589 Event \* S-R type interaction ( $F = 6.71$ ,  $p = 0.003$ ). Moreover, post-hoc tests  
590 (Bonferroni-corrected) revealed, first, that during the retrocue screen cued S-Rs  
591 had higher activation than uncued ( $t = 4.66$ ,  $p < 0.001$ ) and not-presented S-Rs ( $t =$   
592  $5.58$ ,  $p < 0.001$ ), whereas uncued and not-presented S-Rs did not differ ( $t < 1$ ). In  
593 contrast, no differences were found between cued, uncued and not-presented S-  
594 Rs during the encoding epoch (all  $ps > 0.11$ ).

595

596 **Declarative and procedural contributions to instruction implementation in**  
597 **frontoparietal regions (and beyond)**

598 To elucidate which signals govern implementation in control-related regions, we  
599 carried out the template tracking procedure on each FPN region separately.  
600 Furthermore, we decided to include the ventral visual cortex (VVC) in this analysis  
601 to explore the effect of implementation in higher-order visual regions, since these  
602 have been consistently shown to be involved in instruction processing (González-  
603 García et al., 2017a; Muhle-Karbe et al., 2017; Palenciano et al., 2019b, 2019a)  
604 and our univariate results also revealed their engagement in the current task.

605 Importantly, our main goal was to assess whether FPN contained procedural  
606 and/or declarative signals during implementation and not to compare the strength  
607 of these to each other. Therefore, the raw semi-partial correlation of cued pairings  
608 in procedural and declarative formats, which could be biased by for instance higher

609 resemblance between the procedural localizer and the main task, was not  
610 informative for our purpose (and did not differ between procedural [ $M = 0.03$ ,  $SD =$   
611  $0.014$ ] and declarative signals [ $M = 0.03$ ,  $SD = 0.015$ ],  $t < 1$ ,  $p = 0.34$ ). Instead, we  
612 focused on the comparison of these activations to the within-localizer empirical  
613 baselines provided by the irrelevant mappings on each format. Supporting previous  
614 results and theoretical models (Brass et al., 2017; Muhle-Karbe et al., 2017), this  
615 analysis (Fig. 6a) revealed prioritization involves the representation of relevant  
616 information in an action-oriented format in the FPN (two-tail paired t-test against  
617 empirical baseline [not-presented pairings], all  $t_s > 2.16$ , all  $p_s < 0.04$ , all Cohen's  
618  $d > 0.42$ ). Critically, procedural information of cued pairings was significantly more  
619 activated than uncued pairings (all  $t_s > 2.26$ , all  $p_s < 0.04$ , all Cohen's  $d > 0.44$ ).  
620 Regarding declarative information (Fig. 6b), parietal nodes of the FPN showed a  
621 specific enhancement of declarative information of the cued S-R pairing, compared  
622 to the irrelevant ( $t_s > 3$ , all  $p_s < 0.005$ , all Cohen's  $d > 0.6$ ) and uncued ones ( $t_s >$   
623  $2.16$ , all  $p_s < 0.02$ , all Cohen's  $d > 0.49$ ). In contrast, no significant differences  
624 were found in frontal nodes between cued and uncued S-Rs, and cued and  
625 irrelevant S-Rs ( $t_s < 2.06$ , all  $p_s < 0.05$ , all Cohen's  $d < 0.4$ ). To further assess this  
626 difference between frontal and parietal nodes we performed an ANOVA on the  
627 activation scores with the factors ROI (left frontal, right frontal, left parietal, right  
628 parietal) and S-R (cued, irrelevant). This yielded a significant ROI\*S-R interaction  
629 ( $F_{75,3} = 4.33$ ,  $p = 0.007$ ,  $\eta^2_p = 0.15$ ), revealing that the declarative activation of  
630 cued S-Rs was significantly above baseline in parietal ( $F_s > 9.5$ ,  $p_s < 0.005$ ) but  
631 not frontal nodes ( $F_s < 0.6$ ,  $p_s > 0.28$ ) of the FPN. Another ANOVA but with cued

632 and uncued as levels of the S-R factor revealed a similar profile difference,  
633 although the interaction in this case was not significant ( $F = 2$ ,  $p = 0.13$ ). Last, an  
634 ANOVA with uncued and irrelevant as S-R levels revealed no significant  
635 differences in activation between these two levels ( $F = 1.22$ ,  $p = 0.28$ ), and this  
636 was not modulated by the ROI ( $F < 1$ ,  $p = 0.78$ ), suggesting that declarative  
637 information of uncued S-Rs was not activated above baseline in any of the FPN  
638 nodes.

639 Importantly, the lack of declarative activation of cued S-Rs on frontal nodes, and  
640 overall the lower enhancement from baseline compared to procedural information  
641 (as can be seen comparing Figure 6a and 6b) cannot be due to a lower correlation  
642 magnitude of declarative signals with the main task (no significant differences with  
643 the correlation magnitude of procedural signals,  $t < 1$ ,  $p = 0.45$ ). Still, given the  
644 overall low signal-to-noise ratio and pattern reliability in prefrontal cortices  
645 (Bhandari et al., 2018), slight differences inherent in the templates could affect the  
646 activation measures. For instance, it could be argued that the amount of signal in  
647 declarative templates is intrinsically lower than that of procedural templates, which  
648 in turn might induce a lack of power to detect the activation of declarative  
649 templates in the same regions during the task. To rule out these concerns, for each  
650 template and region of the FPN, we compared the signal-to-noise ratio (computed  
651 as mean t-value across voxels of the ROI divided by the standard deviation),  
652 informational content (computed as Shannon entropy) and correlationability of the  
653 templates (i.e. the degree to which individual templates correlated with other  
654 templates from the same localizer). This analysis revealed that procedural and



655 declarative FPN templates did not differ in any of these measures (all  $BF_{10} < 0.5$ ).

656 Moreover, we tested pattern reliability on each localizer separately by assessing

657 the stability of patterns of the same S-R pairing in odd and even trials. To do so,

658 we computed a new GLM with two regressors per S-R pairing, one for odd and

659 another for even trials. We then estimated the correlation (Spearman's rho)

660 between each regressor. Finally, we compared the similarity of each specific S-R

661 pairing (e.g. in odd trials) with its counterpart (in even trials) to the similarity of the

662 same S-R pairing and the rest of pairings (in even trials). A higher within-pairing

663 compared to between-pairing correlations would suggest reliability of the patterns

664 of activity obtained during the localizers. This analysis revealed statistically reliable

665 patterns in all ROIs and in both localizers (all  $t > 2.6$ , all  $p < 0.05$ , FDR-corrected

666 for multiple comparisons), supporting the idea that templates contained S-R

667 specific information.

668 Last, higher-order visual regions showed a similar pattern to parietal nodes of the

669 FPN. As before, the raw semi-partial correlation magnitude of cued pairings with

670 the main task was of no interest and did not differ ( $t < 1$ ,  $p = 0.63$ ) between

671 declarative ( $M = 0.018$ ,  $SD = 0.024$ ) and procedural signals ( $M = 0.022$ ,  $SD =$

672  $0.023$ ). Compared to the empirical baseline, we found a significant enhancement of

673 both procedural ( $t = 8.80$ ,  $p < 0.001$ , Cohen's  $d = 1.73$ ) and declarative ( $t = 6.76$ ,  $p$

674  $< 0.001$ , Cohen's  $d = 1.33$ ) information of the cued S-R pairing. Crucially, these

675 signals were significantly stronger than the ones of uncued mappings (procedural:

676 [ $t = 6.19$ ,  $p < 0.001$ , Cohen's  $d = 1.21$ ]; declarative: [ $t = 5.84$ ,  $p < 0.001$ , Cohen's  $d$

677  $= 1.15$ ]).

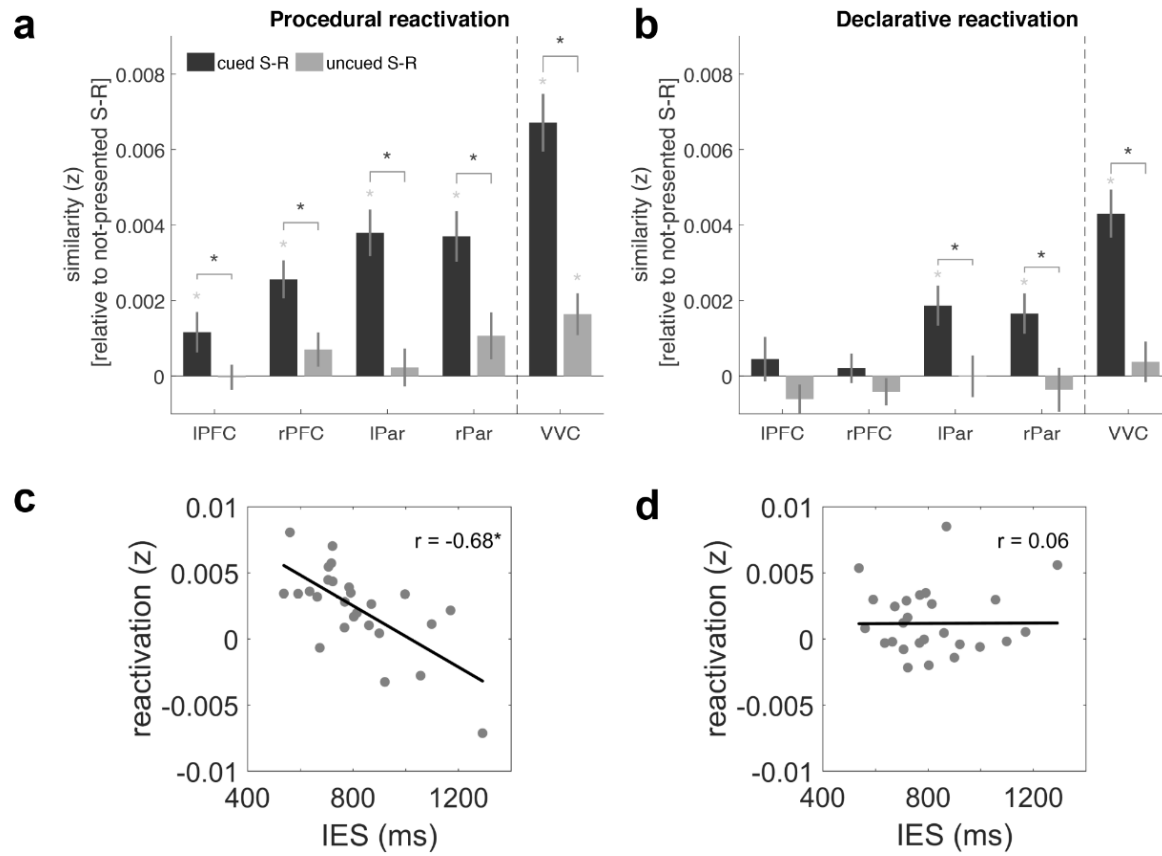

678

679 **Figure 6.** Canonical template tracking procedure results in frontoparietal cortices  
 680 and ventral visual cortex. Bars represent the normalized semi-partial correlation  
 681 between task data and (a) the procedural and (b) declarative templates of cued  
 682 and uncued S-R pairings. Importantly, raw semi-partial correlation magnitudes of  
 683 cued pairings are not informative (and did not differ between procedural and  
 684 declarative signals, all  $t_s < 1$ ), and therefore results are plotted relative to the  
 685 empirical baseline (not-presented S-Rs). Thus, the heights of the bars in panels a  
 686 and b simply reflect the difference from baseline and not necessarily different raw  
 687 semi-partial correlations. Error bars denote within-participants s.e.m. Gray  
 688 asterisks denote a significant increase from baseline ( $p < 0.05$ , paired t-test, FDR-  
 689 corrected). Black asterisks denote significant differences between cued and

690 uncued pairings ( $p < 0.05$ , paired t-test, FDR-corrected). **(c)** Across-participant  
691 correlation of Inverse Efficiency Scores and procedural activation index in  
692 frontoparietal cortices. **(d)** Correlation of Inverse Efficiency Scores with declarative  
693 activation index in frontoparietal cortices. In **c** and **d**, dots represent individual  
694 participants, thick lines depict the linear regression fit, and asterisks denote  
695 significant Pearson's correlation ( $p < 0.05$ ). Activation indices are obtained by  
696 subtracting the activation of uncued S-Rs to the activation of cued S-Rs (this can  
697 lead to negative values, as can be seen in the **c** and **d**).

698

### 699 **Action-oriented codes support novel instruction implementation**

700 To assess the behavioral relevance of declarative and procedural signals, we  
701 reasoned that if action-oriented representations are crucial during implementation  
702 in control-related regions, and implementation can be conceived as a behavior-  
703 optimized state, then the degree of action-oriented activation should predict the  
704 efficiency of instruction execution. To test this hypothesis, we first converted RTs  
705 and error rates of informative retro-cue trials into a single compound measure  
706 (Inverse Efficiency Scores; IES. IES were obtained by dividing each participant's  
707 mean RT by the percentage of accurate responses (Townsend and Ashby, 1983)).  
708 Then, we derived a template activation index by subtracting the degree of  
709 activation of cued pairings to that of uncued pairings for each region and format  
710 (procedural and declarative). Note that this can lead to a negative activation index  
711 (if activation for uncued pairings is stronger than for cued ones). Finally, we  
712 correlated individual IES with the activation indices on each region of the FPN.

713 This analysis revealed significant negative correlations in all FPN regions between  
714 IES and procedural activation (all Pearson's  $r$ s > -0.475, all  $p$ s < 0.02; See Table 2  
715 for individual ROI Pearson's  $r$ s,  $p$ -value and  $BF_{10}$  estimates).

716 Regarding declarative codes, we considered three hypotheses. First, if procedural  
717 representations are highly dependent on the quality of declarative representations  
718 so that participants with high procedural activation also have high declarative  
719 activation, one could expect that declarative signals of relevant S-Rs should in  
720 principle aid performance as well. Second, declarative activations could be driven  
721 primarily by participants with lower procedural activation. In that case, we should  
722 find the opposite correlation with behavior (higher declarative activation would  
723 predict worse performance). Last, if declarative correlations reflect a residual  
724 activation of this coding format that might support the emergence of procedural  
725 codes but it is not itself related to behavior, we should expect no correlation. This  
726 analysis revealed that IES did not correlate with declarative activation in any region  
727 (all  $r$ s < -0.34, all  $p$ s > 0.09), although conclusive evidence for the null hypothesis  
728 was only found for the left DLPFC and right parietal ROIs ( $BF_{10}$ s < 0.3; for the  
729 remaining ROIs, evidence was inconclusive; see Table 2).

|                    | ROI    | $r$    | $p$     | $BF_{10}$ |
|--------------------|--------|--------|---------|-----------|
| <b>procedural</b>  | ldlpfc | -0.475 | 0.014   | 4.203     |
|                    | rdlpfc | -0.583 | 0.002   | 24.887    |
|                    | lpar   | -0.641 | < 0.001 | 88.146    |
|                    | rpar   | -0.605 | 0.001   | 39.057    |
| <b>declarative</b> | ldlpfc | 0.096  | 0.639   | 0.27      |
|                    | rdlpfc | -0.339 | 0.09    | 0.955     |
|                    | lpar   | 0.213  | 0.297   | 0.408     |
|                    | rpar   | 0.113  | 0.582   | 0.281     |

730

731 **Table 2.** Individual ROI Pearson's  $r$ s,  $p$ -values, and  $BF_{10}$  estimates.  $BF$   
732 interpretation is identical to Table 1.

733 When averaging activation indices across FPN regions, an identical pattern was  
734 found, namely, a significant correlation of IES with procedural ( $r = -0.679$ ,  $p <$   
735  $0.001$ ) but not declarative ( $r = 0.06$ ,  $p = 0.77$ ) activation (Fig. 6c-d). Moreover,  
736 these two correlations were significantly different ( $z = -3.13$ ,  $p = 0.0018$ ). Similar  
737 results were obtained when using RTs (procedural:  $r = -0.67$ ,  $p < 0.001$ ;  
738 declarative:  $r = 0.076$ ,  $p = .71$ ) and error rates (procedural:  $r = -0.54$ ,  $p = 0.004$ ;  
739 declarative:  $r = -0.019$ ,  $p = 0.93$ ) as behavioral measures. Also, when removing  
740 participants with negative procedural activation scores (which could reflect the use  
741 of suboptimal strategies to solve the task, or noise in the estimation of the neural  
742 measures) from the analysis, the correlation with IES remained significant ( $r = -$   
743  $0.54$ ,  $p = 0.009$ ), whereas the correlation of declarative activation and IES was not  
744 significant ( $r = -0.17$ ,  $p = 0.43$ ). Finally, we tested if the degree of procedural  
745 activation predicted the degree of declarative activation. This correlation was also  
746 not significant ( $r = -0.17$ ,  $p = 0.40$ ), and if anything pointed in the direction that  
747 participants with higher procedural activation were the ones with weakest  
748 declarative signals, and vice versa.

749 Altogether, these results show that the more implementation was governed by  
750 relevant procedural codes in the FPN, the faster and more accurately participants  
751 executed the instruction. In contrast, the strength of declarative signals of the same  
752 S-R association did not predict behavioral performance.

753

## 754 **DISCUSSION**

755 In the current study, we report a pervasive effect of novel instruction  
756 implementation across behavioral and neural data. A canonical template tracking  
757 procedure revealed that unique declarative and procedural representations govern  
758 FPN activity during implementation, prior to execution. These representations were  
759 specific to prioritized S-Rs and did not take place for irrelevant mappings. Critically,  
760 our results show that procedural (but not declarative) activation in the FPN  
761 predicted efficient execution of novel instructions.

### 762 **Frontoparietal flexible coding of novel S-Rs**

763 Previous research has highlighted the important role of the FPN in the  
764 implementation of novel instructions (Bourguignon et al., 2018; Demanet et al.,  
765 2016; González-García et al., 2017a; Hartstra et al., 2011; Muhle-Karbe et al.,  
766 2017; Palenciano et al., 2019a, 2019b; Ruge and Wolfensteller, 2010).  
767 Accordingly, our results show that the FPN represents relevant S-R pairings during  
768 implementation. However, these results remain agnostic regarding the functional  
769 nature of the neural codes underlying this effect. Here, we leveraged a canonical  
770 template tracking approach to approximate to process-pure measures of  
771 procedural and declarative coding formats. This allowed us to later investigate the  
772 unique contribution of each format to instruction implementation.

773 In accordance with the serial-coding hypothesis, we observed that implementation  
774 engaged the activation of procedural representations (Brass et al., 2017; Muhle-  
775 Karbe et al., 2017). Interestingly, our results show that, in addition to procedural

776 codes, some nodes of the FPN preserve relevant declarative information about the  
777 upcoming task.

778 A first consideration concerns the exact nature of the reactivated signals. In the  
779 declarative localizer, participants had to remember specific S-R associations and  
780 match them to another S-R probe. In contrast, in the procedural localizer,  
781 participants' goal was to execute the correct response associated with a target  
782 stimulus. The different readout from WM thus encouraged different strategies, as  
783 suggested by previous studies (González-García et al., 2020; Liefoghe et al.,  
784 2012; Muhle-Karbe et al., 2017). Therefore, it is conceivable that templates will  
785 contain unique information: a persistent maintenance of the memoranda in the  
786 declarative localizer, and a proactive action-oriented representation in the  
787 procedural localizer. However, procedural and declarative representations likely  
788 share further information, for instance, related to specific perceptual stimulation  
789 and domain-general processes, such as arousal or attention. We took several  
790 measures to reduce the influence of such components. First, template activation  
791 was derived from semi-partial correlations between data from the main task and  
792 the localizers. Thus, our measure reflects unique shared variance between the  
793 task and the representation of an S-R pairing in a given localizer, partialling out the  
794 variance explained by the representation of the same S-R in the remaining  
795 localizer. Importantly, our study was aimed at assessing the presence (or lack  
796 thereof) of procedural and/or declarative signals and not at comparing to what  
797 extent one signal might be more predictive than the other, and therefore we base  
798 our results in activation of templates relative to empirical baselines provided by

799 not-presented S-Rs. Second, templates were built for S-R pairings rather than  
800 unique mappings, and therefore a contribution of perceptual features to template  
801 activation seems unlikely. Moreover, semi-partial correlations were computed  
802 between data from the retro-cue screen (in the main task), and inter-stimulus  
803 interval (in the localizers), which reduces the likelihood of significant correlations  
804 due to perceptual similarity between templates and specific S-Rs. Therefore,  
805 although other non-mutually exclusive explanations cannot be fully discarded (e.g.  
806 “procedural” templates containing procedural signals but also any other code  
807 present in the procedural localizer and not in the declarative one), we believe it is  
808 the most parsimonious interpretation to consider that our procedure succeeded at  
809 tracking format-specific signals, especially given the validation results in the motor  
810 cortex.

811 An important aspect then concerns the specific functional significance of each  
812 format. Regarding procedural templates, although the configuration of the  
813 procedural localizer was similar to the main task, the highly action-oriented  
814 encoding format encouraged during this localizer was strategically optimal only  
815 after the selection process elicited by the retro-cue in the main task. Thus, this  
816 localizer allowed us to test whether the selection of an S-R from WM engaged the  
817 same procedural signals elicited by encoding tasks with the intention to implement.  
818 With respect to the declarative templates, an intriguing question is what exactly is  
819 being reactivated, and how is this not present in the procedural localizer (which  
820 necessarily has to contain some declarative information as well (Formica et al.,  
821 2020a)). One possibility is that the specific demands of each localizer encourage



822 differentiated coding strategies, that is, different readouts from WM could modulate  
823 the specific way in which each format is represented. However, we believe a more  
824 likely, non-mutually exclusive possibility regards the previously mentioned  
825 distinction between the procedural localizer and the main task. Given that the  
826 process of maintenance prior to selection is likely diminished in the procedural  
827 localizer, it is feasible that such maintenance signals are present in the main task  
828 relatively independent from the codes established in the procedural localizer. In  
829 turn, it is possible that declarative codes account at least partially for such  
830 maintenance components, leading to the observed declarative activations in the  
831 main task.

832 From this standpoint, our results suggest that during novel instruction  
833 implementation, FPN regions contain information about the declarative  
834 memoranda conveyed by the instruction and an independent action-oriented S-R  
835 code that primarily drives task execution.

### 836 **Heterogeneous S-R coding within the FPN**

837 Although we did not have specific hypotheses for the role of individual FPN  
838 regions, a second important finding concerns the heterogeneity of results within  
839 this network. Frontal nodes showed the implementation profile predicted by the  
840 serial-coding hypothesis, namely, a primarily procedural representation of  
841 instructed content. This is in line with previous studies that propose a crucial role of  
842 the frontolateral cortex in the integration of stimulus and response information into  
843 a task set based on verbal instructions (De Baene et al., 2012; Hartstra et al.,

844 2012, 2011), as well as in representing task rules (Jackson and Woolgar, 2018;  
845 Loose et al., 2017; Wisniewski et al., 2019; Woolgar et al., 2015) and goals  
846 (Muhle-Karbe et al., 2014).

847 In contrast, parietal nodes carried both procedural and declarative information in  
848 their patterns of activity. Whereas the role of parietal regions in representing goals  
849 and task set information is widely acknowledged (González-García et al., 2017a;  
850 Jackson and Woolgar, 2018; Muhle-Karbe et al., 2017, 2014; Palenciano et al.,  
851 2019b; Wisniewski et al., 2015; Woolgar et al., 2015), it is unclear what drives such  
852 declarative activation. One possibility is that it reflects a category-specific top-down  
853 selection scheme, driven by increased attention towards the cued S-R (Nobre et  
854 al., 2004; Tamber-Rosenau et al., 2011). The fact that a similar pattern was found  
855 in higher-order visual regions, which usually coordinate with parietal cortices to  
856 represent relevant task dimensions in anticipation of future demands (González-  
857 García et al., 2015; Kuo et al., 2014; Lepsien and Nobre, 2007), further supports  
858 this possibility. This tentative interpretation would be coherent with goal neglect  
859 effects reported in patients with frontal lobe damage (Duncan et al., 1996). These  
860 patients are capable of selecting, maintaining, and remembering task-relevant  
861 information, yet their ability to transform relevant information into goal-driven  
862 actions is impaired. Such dissociation goes at least partially in line with our results  
863 in that (1) goal-oriented representations depends critically on prefrontal cortices  
864 (impaired in goal neglect patients), and (2) the involvement of other control-related  
865 regions, intact in these patients, boosts the declarative representation of specific  
866 task information, such as particular S-R pairings, presumably in coordination with

867 posterior category-selective regions. However, these results should be interpreted  
868 with caution, since the difference between frontal and parietal regions could partly  
869 reflect a difference in activation magnitude not captured by our method, due to a  
870 generally weaker coding in frontal lobes (Bhandari et al., 2018). Still, the impact of  
871 this alternative interpretation seems relatively limited, given we observed a similar  
872 raw semi-partial correlation magnitude of cued pairings with the main task, and no  
873 differences in terms of signal-to-noise ratio, informational content, and  
874 correlationability of the templates.

### 875 **Implementation as a selective output gating process**

876 Remarkably, although we found both signals in the FPN during implementation,  
877 only procedural representations predicted efficient behavior and, if anything,  
878 stronger procedural activations did not predict stronger declarative signals. The  
879 fact that implementation is signaled by retro-cues renders this effect relevant to  
880 current debates on information prioritization and WM architecture. In this regard,  
881 our results are consistent with the interpretation of implementation as a particular  
882 instance of output gating mechanisms. Similar to the idea of an input gate that  
883 limits what information enters WM, some computational models propose an  
884 additional gate that determines which pieces of this information will drive behavior  
885 (Chatham et al., 2014). Recent theoretical frameworks suggest a role of  
886 prioritization not only in selecting relevant content from WM but also in reformatting  
887 such content into a “behavior-guiding representational state” (Myers et al., 2017),  
888 analogous to an output gating mechanism. Interestingly, these models propose  
889 that whereas other control-related regions might be involved in attention-driven

890 representations of relevant content, frontal regions are thought to be especially  
891 important in transferring this content into a state that is optimal for behavior.  
892 Accordingly, our results suggest that an action-oriented representation of novel  
893 instructions dominates activity in frontal cortices and that this representational  
894 format is tightly linked to behavioral efficiency. A limitation of the current study  
895 concerns the lack of specificity on what precise information is captured on each  
896 template: it is possible that part of the correlation with behavior we observe is  
897 driven not only by procedural codes but also by any other code of different nature  
898 that is present in the procedural localizer and not in the declarative one, although  
899 what this code would be specifically remains unknown. This question awaits further  
900 investigation.

901 Importantly, our results reveal that the neural substrate of instruction prioritization  
902 involves further brain regions, such as category-selective and parietal cortices, and  
903 that procedural and declarative information coexist in these regions. This raises the  
904 question of what the contribution of declarative representations might be. One  
905 possibility is that declarative codes support the generation and maintenance of  
906 procedural codes, but once these are created, they do not directly contribute to  
907 behavior. It should be noted, however, that fMRI data lacks the temporal resolution  
908 to discern the dynamic profile of these two representational formats. Thus, the  
909 conclusions about the dynamics of declarative and procedural codes in the FPN  
910 we can extract from the current dataset are limited. Further research is needed to  
911 elucidate whether, in smaller timescales, a temporal hierarchy between these two  
912 signals can be established or, in contrast, whether both signals are held

913 simultaneously in these regions. Future studies should employ time-resolved  
914 techniques that can succeed at characterizing the contribution of different brain  
915 regions to separate control and WM processes (Quentin et al., 2019).

916 Last, the current work relies on a relatively high number of tests and decisions  
917 along the analysis pipeline, which could potentially impact the results and the  
918 conclusions extracted from them (Botvinik-Nezer et al., 2020). As such, the new  
919 method proposed here would benefit from independent conceptual replications and  
920 extension of the current findings in the future.

## 921 **CONCLUSIONS**

922 In summary, the present study reveals the strong impact of instruction  
923 implementation on frontoparietal regions. We observed that these regions contain  
924 information about prioritized S-R pairings in detriment of the irrelevant ones during  
925 implementation. This information contained two non-overlapping neural codes, one  
926 reflecting the declarative maintenance of task, and another, more pragmatic,  
927 action-oriented coding of the instruction. Importantly, the strength of procedural  
928 activation predicted behavioral performance. Altogether, our results highlight the  
929 contribution of frontoparietal regions to output gating mechanisms that drive  
930 flexible behavior.

931

932

933 **Financial interests or conflicts of interest:** none declared.

934 **Acknowledgments:** C.G.G. and S.F. were supported by the Special Research

935 Fund of Ghent University BOF.GOA.2017.0002.03. C.G.G. was additionally

936 supported by the European Union's Horizon 2020 research and innovation

937 programme under the Marie Skłodowska-Curie grant agreement no. 835767. D.W.

938 was supported by FWO and the European Union's Horizon 2020 Research and

939 Innovation Program under the Marie Skłodowska-Curie grant agreement no.

940 665501. We thank Senne Braem for feedback on previous drafts of the manuscript.

941

942 **References**

- 943 Bhandari, A., Gagne, C., Badre, D., 2018. Just above Chance: Is It Harder to  
944 Decode Information from Human Prefrontal Cortex Blood Oxygenation Level-  
945 dependent Signals? *J. Cogn. Neurosci.* 1–26.  
946 [https://doi.org/10.1162/jocn\\_a\\_01291](https://doi.org/10.1162/jocn_a_01291)
- 947 Botvinik-Nezer, R., Holzmeister, F., Camerer, C.F., Dreber, A., Huber, J.,  
948 Johannesson, M., Kirchler, M., Iwanir, R., Mumford, J.A., Adcock, R.A.,  
949 Avesani, P., Baczkowski, B.M., Bajracharya, A., Bakst, L., Ball, S., Barilari, M.,  
950 Bault, N., Beaton, D., Beitner, J., Benoit, R.G., Berkers, R.M.W.J., Bhanji, J.P.,  
951 Biswal, B.B., Bobadilla-Suarez, S., Bortolini, T., Bottenhorn, K.L., Bowring, A.,  
952 Braem, S., Brooks, H.R., Brudner, E.G., Calderon, C.B., Camilleri, J.A.,  
953 Castrellon, J.J., Cecchetti, L., Cieslik, E.C., Cole, Z.J., Collignon, O., Cox,  
954 R.W., Cunningham, W.A., Czoschke, S., Dadi, K., Davis, C.P., Luca, A. De,  
955 Delgado, M.R., Demetriou, L., Dennison, J.B., Di, X., Dickie, E.W.,  
956 Dobryakova, E., Donnat, C.L., Dukart, J., Duncan, N.W., Durnez, J., Eed, A.,  
957 Eickhoff, S.B., Erhart, A., Fontanesi, L., Fricke, G.M., Fu, S., Galván, A., Gau,  
958 R., Genon, S., Glatard, T., Glerean, E., Goeman, J.J., Golowin, S.A.E.,  
959 González-García, C., Gorgolewski, K.J., Grady, C.L., Green, M.A., Guassi  
960 Moreira, J.F., Guest, O., Hakimi, S., Hamilton, J.P., Hancock, R., Handjaras,  
961 G., Harry, B.B., Hawco, C., Herholz, P., Herman, G., Heunis, S., Hoffstaedter,  
962 F., Hogeveen, J., Holmes, S., Hu, C., Huettel, S.A., Hughes, M.E., Iacovella,  
963 V., Iordan, A.D., Isager, P.M., Isik, A.I., Jahn, A., Johnson, M.R., Johnstone,  
964 T., Joseph, M.J.E., Juliano, A.C., Kable, J.W., Kassinopoulos, M., Koba, C.,

965 Kong, X., Kosciak, T.R., Kucukboyaci, N.E., Kuhl, B.A., Kupek, S., Laird, A.R.,  
966 Lamm, C., Langner, R., Lauharatanahirun, N., Lee, H., Lee, S., Leemans, A.,  
967 Leo, A., Lesage, E., Li, F., Li, M.Y.C., Lim, P.C., Lintz, E.N., Liphardt, S.W.,  
968 Losecaat Vermeer, A.B., Love, B.C., Mack, M.L., Malpica, N., Marins, T.,  
969 Maumet, C., McDonald, K., McGuire, J.T., Melero, H., Méndez Leal, A.S.,  
970 Meyer, B., Meyer, K.N., Mihai, G., Mitsis, G.D., Moll, J., Nielson, D.M.,  
971 Nilsonne, G., Notter, M.P., Olivetti, E., Onicas, A.I., Papale, P., Patil, K.R.,  
972 Peelle, J.E., Pérez, A., Pischedda, D., Poline, J.-B., Prystauka, Y., Ray, S.,  
973 Reuter-Lorenz, P.A., Reynolds, R.C., Ricciardi, E., Rieck, J.R., Rodriguez-  
974 Thompson, A.M., Romyn, A., Salo, T., Samanez-Larkin, G.R., Sanz-Morales,  
975 E., Schlichting, M.L., Schultz, D.H., Shen, Q., Sheridan, M.A., Silvers, J.A.,  
976 Skagerlund, K., Smith, A., Smith, D. V., Sokol-Hessner, P., Steinkamp, S.R.,  
977 Tashjian, S.M., Thirion, B., Thorp, J.N., Tinghög, G., Tisdall, L., Tompson,  
978 S.H., Toro-Serey, C., Torre Tresols, J.J., Tozzi, L., Truong, V., Turella, L., van  
979 't Veer, A.E., Verguts, T., Vettel, J.M., Vijayarajah, S., Vo, K., Wall, M.B.,  
980 Weeda, W.D., Weis, S., White, D.J., Wisniewski, D., Xifra-Porxas, A.,  
981 Yearling, E.A., Yoon, S., Yuan, R., Yuen, K.S.L., Zhang, L., Zhang, X., Zosky,  
982 J.E., Nichols, T.E., Poldrack, R.A., Schonberg, T., 2020. Variability in the  
983 analysis of a single neuroimaging dataset by many teams\_suppl. *Nature* 1–7.  
984 <https://doi.org/10.1038/s41586-020-2314-9>

985 Bourguignon, N.J., Braem, S., Hartstra, E., De Houwer, J., Brass, M., 2018.  
986 Encoding of Novel Verbal Instructions for Prospective Action in the Lateral  
987 Prefrontal Cortex: Evidence from Univariate and Multivariate Functional



- 988           Magnetic Resonance Imaging Analysis. *J. Cogn. Neurosci.* 30, 1170–1184.  
989           [https://doi.org/10.1162/jocn\\_a\\_01270](https://doi.org/10.1162/jocn_a_01270)
- 990   Brady, T.F., Konkle, T., Alvarez, G.A., Oliva, A., 2013. Real-world objects are not  
991           represented as bound units: Independent forgetting of different object details  
992           from visual memory. *J. Exp. Psychol. Gen.* 142, 791.  
993           <https://doi.org/10.1037/a0029649>
- 994   Brady, T.F., Konkle, T., Alvarez, G.A., Oliva, A., 2008. Visual long-term memory  
995           has a massive storage capacity for object details. *Proc. Natl. Acad. Sci.* 105,  
996           14325–14329. <https://doi.org/10.1073/pnas.0803390105>
- 997   Brass, M., Liefoghe, B., Braem, S., De Houwer, J., 2017. Following new task  
998           instructions: Evidence for a dissociation between knowing and doing.  
999           *Neurosci. Biobehav. Rev.* 81, 16–28.  
1000           <https://doi.org/10.1016/j.neubiorev.2017.02.012>
- 1001   Brodeur, M.B., Guérard, K., Bouras, M., 2014. Bank of Standardized Stimuli  
1002           (BOSS) phase ii: 930 new normative photos. *PLoS One* 9, e106953.  
1003           <https://doi.org/10.1371/journal.pone.0106953>
- 1004   Chatham, C.H., Frank, M.J., Badre, D., 2014. Corticostriatal Output Gating during  
1005           Selection from Working Memory. *Neuron* 81, 930–942.  
1006           <https://doi.org/10.1016/J.NEURON.2014.01.002>
- 1007   Cole, M.W., Laurent, P., Stocco, A., 2013. Rapid instructed task learning: A new  
1008           window into the human brain’s unique capacity for flexible cognitive control.  
1009           *Cogn. Affect. Behav. Neurosci.* 13, 1–22. <https://doi.org/10.3758/s13415-012->

1010 0125-7

1011 Combrisson, E., Jerbi, K., 2015. Exceeding chance level by chance: The caveat of  
1012 theoretical chance levels in brain signal classification and statistical  
1013 assessment of decoding accuracy. *J. Neurosci. Methods* 250, 126–136.  
1014 <https://doi.org/10.1016/j.jneumeth.2015.01.010>

1015 De Baene, W., Albers, A.M., Brass, M., 2012. The what and how components of  
1016 cognitive control. *Neuroimage* 63, 203–211.  
1017 <https://doi.org/10.1016/j.neuroimage.2012.06.050>

1018 Demanet, J., Liefoghe, B., Hartstra, E., Wenke, D., De Houwer, J., Brass, M.,  
1019 2016. There is more into ‘doing’ than ‘knowing’: The function of the right  
1020 inferior frontal sulcus is specific for implementing versus memorising verbal  
1021 instructions. *Neuroimage* 141, 350–356.  
1022 <https://doi.org/10.1016/j.neuroimage.2016.07.059>

1023 Duncan, J., Emslie, H., Williams, P., Johnson, R., Freer, C., 1996. Intelligence and  
1024 the frontal lobe: the organization of goal-directed behavior. *Cogn. Psychol.* 30,  
1025 257–303. <https://doi.org/10.1006/cogp.1996.0008>

1026 Eklund, A., Nichols, T.E., Knutsson, H., 2016. Cluster failure: Why fMRI inferences  
1027 for spatial extent have inflated false-positive rates. *Proc. Natl. Acad. Sci.* 113,  
1028 7900–7905. <https://doi.org/10.1073/pnas.1602413113>

1029 Everaert, T., Theeuwes, M., Liefoghe, B., De Houwer, J., 2014. Automatic motor  
1030 activation by mere instruction. *Cogn. Affect. Behav. Neurosci.* 14, 1300–1309.  
1031 <https://doi.org/10.3758/s13415-014-0294-7>

- 1032 Fedorenko, E., Duncan, J., Kanwisher, N., 2013. Broad domain generality in focal  
1033 regions of frontal and parietal cortex. *Proc. Natl. Acad. Sci.* 110, 16616–  
1034 16621. <https://doi.org/10.1073/pnas.1315235110>
- 1035 Formica, S., González-García, C., Brass, M., 2020a. The effects of declaratively  
1036 maintaining and proactively proceduralizing novel stimulus-response  
1037 mappings. *Cognition* 201, 104295.  
1038 <https://doi.org/10.1016/J.COGNITION.2020.104295>
- 1039 Formica, S., González-García, C., Senoussi, M., Brass, M., 2020b. Neural  
1040 oscillations dissociate between memorization and proceduralization of novel  
1041 instructions. *bioRxiv* 2020.01.20.912162.  
1042 <https://doi.org/10.1101/2020.01.20.912162>
- 1043 González-García, C., Arco, J.E., Palenciano, A.F., Ramírez, J., Ruz, M., 2017a.  
1044 Encoding, preparation and implementation of novel complex verbal  
1045 instructions. *Neuroimage* 148, 264–273.  
1046 <https://doi.org/10.1016/j.neuroimage.2017.01.037>
- 1047 González-García, C., Arco, J.E., Palenciano, A.F., Ramírez, J., Ruz, M., 2017b.  
1048 Encoding, preparation and implementation of novel complex verbal  
1049 instructions. *Neuroimage* 148, 264–273.  
1050 <https://doi.org/10.1016/j.neuroimage.2017.01.037>
- 1051 González-García, C., Formica, S., Liefoghe, B., Brass, M., 2020. Attentional  
1052 prioritization reconfigures novel instructions into action-oriented task sets.  
1053 *Cognition* 194, 104059. <https://doi.org/10.1016/j.cognition.2019.104059>

- 1054 González-García, C., Mas-Herrero, E., de Diego-Balaguer, R., Ruz, M., 2015.  
1055 Task-specific preparatory neural activations in low-interference contexts. *Brain*  
1056 *Struct. Funct.* <https://doi.org/10.1007/s00429-015-1141-5>
- 1057 Gorgolewski, K.J., Alfaro-Almagro, F., Auer, T., Bellec, P., Capotă, M.,  
1058 Chakravarty, M.M., Churchill, N.W., Cohen, A.L., Craddock, R.C., Devenyi,  
1059 G.A., Eklund, A., Esteban, O., Flandin, G., Ghosh, S.S., Guntupalli, J.S.,  
1060 Jenkinson, M., Keshavan, A., Kiar, G., Liem, F., Raamana, P.R., Raffelt, D.,  
1061 Steele, C.J., Quirion, P.-O., Smith, R.E., Strother, S.C., Varoquaux, G., Wang,  
1062 Y., Yarkoni, T., Poldrack, R.A., 2017. BIDS apps: Improving ease of use,  
1063 accessibility, and reproducibility of neuroimaging data analysis methods.  
1064 *PLOS Comput. Biol.* 13, e1005209.
- 1065 Griffin, G., Holub, A., Perona, P., 2006. Caltech-256 object category dataset,  
1066 Caltech Technical Report. <https://doi.org/10.1021/jp953720e>
- 1067 Hartstra, E., Kühn, S., Verguts, T., Brass, M., 2011. The implementation of verbal  
1068 instructions: An fMRI study. *Hum. Brain Mapp.* 32, 1811–1824.  
1069 <https://doi.org/10.1002/hbm.21152>
- 1070 Hartstra, E., Waszak, F., Brass, M., 2012. The implementation of verbal  
1071 instructions: Dissociating motor preparation from the formation of stimulus–  
1072 response associations. *Neuroimage* 63, 1143–1153.  
1073 <https://doi.org/10.1016/j.neuroimage.2012.08.003>
- 1074 Hebart, M.N., Görden, K., Haynes, J.-D., 2015. The Decoding Toolbox (TDT): a  
1075 versatile software package for multivariate analyses of functional imaging

- 1076 data. *Front. Neuroinform.* 8. <https://doi.org/10.3389/fninf.2014.00088>
- 1077 Jackson, J.B., Woolgar, A., 2018. Adaptive coding in the human brain: Distinct  
1078 object features are encoded by overlapping voxels in frontoparietal cortex.  
1079 *Cortex* 108, 25–34. <https://doi.org/10.1016/J.CORTEX.2018.07.006>
- 1080 JASP Team, 2018. JASP. [Computer software].
- 1081 Konkle, T., Brady, T.F., Alvarez, G.A., Oliva, A., 2010. Conceptual distinctiveness  
1082 supports detailed visual long-term memory for real-world objects. *J. Exp.*  
1083 *Psychol. Gen.* 139, 558. <https://doi.org/10.1037/a0019165>
- 1084 Kuo, B.-C., Stokes, M.G., Murray, A.M., Nobre, A.C., 2014. Attention Biases Visual  
1085 Activity in Visual Short-term Memory. *J. Cogn. Neurosci.* 26, 1377–1389.  
1086 [https://doi.org/10.1162/jocn\\_a\\_00577](https://doi.org/10.1162/jocn_a_00577)
- 1087 Ledoit, O., Wolf, M., 2004. A well-conditioned estimator for large-dimensional  
1088 covariance matrices. *J. Multivar. Anal.* 88, 365–411.  
1089 [https://doi.org/10.1016/S0047-259X\(03\)00096-4](https://doi.org/10.1016/S0047-259X(03)00096-4)
- 1090 Lepsien, J., Nobre, A.C., 2007. Attentional Modulation of Object Representations in  
1091 Working Memory. *Cereb. Cortex* 17, 2072–2083.  
1092 <https://doi.org/10.1093/cercor/bhl116>
- 1093 Liefoghe, B., De Houwer, J., 2018. Automatic effects of instructions do not require  
1094 the intention to execute these instructions. *J. Cogn. Psychol.* 1–14.  
1095 <https://doi.org/10.1080/20445911.2017.1365871>
- 1096 Liefoghe, B., Houwer, J. De, Wenke, D., 2013. Instruction-based response

- 1097 activation depends on task preparation. *Psychon. Bull. Rev.* 20, 481–487.
- 1098 <https://doi.org/10.3758/s13423-013-0374-7>
- 1099 Liefoghe, B., Wenke, D., De Houwer, J., 2012. Instruction-based task-rule  
1100 congruency effects. *J. Exp. Psychol. Learn. Mem. Cogn.* 38, 1325–1335.  
1101 <https://doi.org/10.1037/a0028148>
- 1102 Loose, L.S., Wisniewski, D., Rusconi, M., Goschke, T., Haynes, J.D., 2017.  
1103 Switch-independent task representations in frontal and parietal cortex. *J.*  
1104 *Neurosci.* 37, 8033–8042. <https://doi.org/10.1523/JNEUROSCI.3656-16.2017>
- 1105 Meiran, N., Cole, M.W., Braver, T.S., 2012. When planning results in loss of  
1106 control: intention-based reflexivity and working-memory. *Front. Hum.*  
1107 *Neurosci.* 6, 104. <https://doi.org/10.3389/fnhum.2012.00104>
- 1108 Meiran, N., Pereg, M., Kessler, Y., Cole, M.W., Braver, T.S., 2015a. The power of  
1109 instructions: Proactive configuration of stimulus–response translation. *J. Exp.*  
1110 *Psychol. Learn. Mem. Cogn.* 41, 768–786. <https://doi.org/10.1037/xlm0000063>
- 1111 Meiran, N., Pereg, M., Kessler, Y., Cole, M.W., Braver, T.S., 2015b. Reflexive  
1112 activation of newly instructed stimulus–response rules: evidence from  
1113 lateralized readiness potentials in no-go trials. *Cogn. Affect. Behav. Neurosci.*  
1114 15, 365–373. <https://doi.org/10.3758/s13415-014-0321-8>
- 1115 Morey, R.D., 2008. Confidence Intervals from Normalized Data: A correction to  
1116 Cousineau (2005). *Tutor. Quant. Methods Psychol.*  
1117 <https://doi.org/10.20982/tqmp.04.2.p061>

- 1118 Muhle-Karbe, P.S., Andres, M., Brass, M., Andres, M., 2014. Transcranial  
1119 magnetic stimulation dissociates prefrontal and parietal contributions to task  
1120 preparation. *J. Neurosci.* 34, 12481–12489.  
1121 <https://doi.org/10.1523/JNEUROSCI.4931-13.2014>
- 1122 Muhle-Karbe, P.S., Duncan, J., Baene, W. De, Mitchell, D.J., Brass, M., 2017.  
1123 Neural Coding for Instruction-Based Task Sets in Human Frontoparietal and  
1124 Visual Cortex. *Cereb. Cortex* 27, 1891–1905.  
1125 <https://doi.org/10.1093/cercor/bhw032>
- 1126 Muhle-Karbe, P.S., Duncan, J., Baene, W. De, Mitchell, D.J., Brass, M., 2016.  
1127 Neural Coding for Instruction-Based Task Sets in Human Frontoparietal and  
1128 Visual Cortex. *Cereb. Cortex* bhw032. <https://doi.org/10.1093/cercor/bhw032>
- 1129 Myers, N.E., Chekroud, S.R., Stokes, M.G., Nobre, A.C., 2018. Benefits of flexible  
1130 prioritization in working memory can arise without costs. *J. Exp. Psychol.*  
1131 *Hum. Percept. Perform.* 44, 398–411. <https://doi.org/10.1037/xhp0000449>
- 1132 Myers, N.E., Stokes, M.G., Nobre, A.C., 2017. Prioritizing Information during  
1133 Working Memory: Beyond Sustained Internal Attention. *Trends Cogn. Sci.* 21,  
1134 449–461. <https://doi.org/10.1016/j.tics.2017.03.010>
- 1135 Nichols, T.E., Das, S., Eickhoff, S.B., Evans, A.C., Glatard, T., Hanke, M.,  
1136 Kriegeskorte, N., Milham, M.P., Poldrack, R.A., Poline, J.-B., Proal, E., Thirion,  
1137 B., Van Essen, D.C., White, T., Yeo, B.T.T., 2017. Best practices in data  
1138 analysis and sharing in neuroimaging using MRI. *Nat. Neurosci.* 20, 299–303.  
1139 <https://doi.org/10.1038/nn.4500>

- 1140 Nobre, A.C., Coull, J.T., Maquet, P., Frith, C.D., Vandenberghe, R., Mesulam,  
1141 M.M., 2004. Orienting Attention to Locations in Perceptual Versus Mental  
1142 Representations. *J. Cogn. Neurosci.* 16, 363–373.  
1143 <https://doi.org/10.1162/089892904322926700>
- 1144 Palenciano, A.F., González-García, C., Arco, J.E., Pessoa, L., Ruz, M., 2019a.  
1145 Representational organization of novel task sets during proactive encoding. *J.*  
1146 *Neurosci.* 719–725. <https://doi.org/10.1523/JNEUROSCI.0725-19.2019>
- 1147 Palenciano, A.F., González-García, C., Arco, J.E., Ruz, M., 2019b. Transient and  
1148 Sustained Control Mechanisms Supporting Novel Instructed Behavior. *Cereb.*  
1149 *Cortex* 29, 3948–3960. <https://doi.org/10.1093/cercor/bhy273>
- 1150 Peirce, J.W., 2007. PsychoPy-Psychophysics software in Python. *J. Neurosci.*  
1151 *Methods.* <https://doi.org/10.1016/j.jneumeth.2006.11.017>
- 1152 Qiao, L., Zhang, L., Chen, A., Egner, T., 2017. Dynamic trial-by-trial recoding of  
1153 task-set representations in the frontoparietal cortex mediates behavioral  
1154 flexibility. *J. Neurosci.* 37, 11037–11050.  
1155 <https://doi.org/10.1523/JNEUROSCI.0935-17.2017>
- 1156 Quentin, R., King, J.-R., Sallard, E., Fishman, N., Thompson, R., Buch, E.R.,  
1157 Cohen, L.G., 2019. Differential Brain Mechanisms of Selection and  
1158 Maintenance of Information during Working Memory. *J. Neurosci.* 39, 3728 LP  
1159 – 3740. <https://doi.org/10.1523/JNEUROSCI.2764-18.2019>
- 1160 Ruge, H., Schäfer, T.A.J., Zwosta, K., Mohr, H., Wolfensteller, U., 2019. Neural  
1161 representation of newly instructed rule identities during early implementation



- 1162 trials. *Elife* 8. <https://doi.org/10.7554/eLife.48293>
- 1163 Ruge, H., Wolfensteller, U., 2010. Rapid formation of pragmatic rule  
1164 representations in the human brain during instruction-based learning. *Cereb.*  
1165 *Cortex* 20, 1656–1667. <https://doi.org/10.1093/cercor/bhp228>
- 1166 Tamber-Rosenau, B.J., Esterman, M., Chiu, Y.-C., Yantis, S., 2011. Cortical  
1167 Mechanisms of Cognitive Control for Shifting Attention in Vision and Working  
1168 Memory. *J. Cogn. Neurosci.* 23, 2905–2919.  
1169 <https://doi.org/10.1162/jocn.2011.21608>
- 1170 Townsend, J., Ashby, F.G., 1983. Stochastic modeling of elementary psychological  
1171 processes. Cambridge: Cambridge University Press., Cambridge.
- 1172 Walther, A., Nili, H., Ejaz, N., Alink, A., Kriegeskorte, N., Diedrichsen, J., 2016.  
1173 Reliability of dissimilarity measures for multi-voxel pattern analysis.  
1174 *Neuroimage* 137, 188–200.  
1175 <https://doi.org/10.1016/J.NEUROIMAGE.2015.12.012>
- 1176 Wimber, M., Alink, A., Charest, I., Kriegeskorte, N., Anderson, M.C., 2015.  
1177 Retrieval induces adaptive forgetting of competing memories via cortical  
1178 pattern suppression. *Nat. Neurosci.* 18, 582–589.  
1179 <https://doi.org/10.1038/nn.3973>
- 1180 Wisniewski, D., Forstmann, B., Brass, M., 2019. Outcome contingency selectively  
1181 affects the neural coding of outcomes but not of tasks. *Sci. Rep.* 9, 1–15.  
1182 <https://doi.org/10.1038/s41598-019-55887-0>

- 1183 Wisniewski, D., Reverberi, C., Tusche, A., Haynes, J.-D., 2015. The Neural  
1184 Representation of Voluntary Task-Set Selection in Dynamic Environments.  
1185 Cereb. Cortex 25, 4715–4726. <https://doi.org/10.1093/cercor/bhu155>
- 1186 Woolgar, A., Afshar, S., Williams, M.A., Rich, A.N., 2015. Flexible Coding of Task  
1187 Rules in Frontoparietal Cortex: An Adaptive System for Flexible Cognitive  
1188 Control. J. Cogn. Neurosci. 27, 1895–1911.  
1189 [https://doi.org/10.1162/jocn\\_a\\_00827](https://doi.org/10.1162/jocn_a_00827)
- 1190 Yu, Q., Postle, B.R., 2018. Different states of priority recruit different neural codes  
1191 in visual working memory. bioRxiv 334920. <https://doi.org/10.1101/334920>
- 1192 Zhang, J., Kriegeskorte, N., Carlin, J.D., Rowe, J.B., 2013. Choosing the Rules:  
1193 Distinct and Overlapping Frontoparietal Representations of Task Rules for  
1194 Perceptual Decisions. J. Neurosci. 33, 11852–11862.  
1195 <https://doi.org/10.1523/JNEUROSCI.5193-12.2013>
- 1196
